1 **FER-LIKE IRON DEFICIENCY-INDUCED TRANSCRIPTION FACTOR (FIT)**  
2 **accumulates in homo- and heterodimeric complexes in dynamic and inducible**  
3 **nuclear condensates associated with speckle components**

4 Short title: FIT localizes in condensates

5 Ksenia Trofimov<sup>1</sup>, Regina Gratz<sup>1,§</sup>, Rumen Ivanov<sup>1</sup>, Yvonne Stahl<sup>2,3</sup>, Petra Bauer<sup>1,3,\*</sup>,  
6 Tzvetina Brumbarova<sup>1,\*</sup>

7 <sup>1</sup> Institute of Botany, Heinrich-Heine-University, 40225 Düsseldorf, Germany

8 <sup>2</sup> Institute for Developmental Genetics, Heinrich-Heine-University, 40225 Düsseldorf,  
9 Germany

10 <sup>3</sup> Cluster of Excellence on Plant Science (CEPLAS), Heinrich-Heine-University, 40225  
11 Düsseldorf, Germany

12 \* Shared corresponding authors: Tzvetina Brumbarova (Tzvetina.Brumbarova@hhu.de),  
13 Petra Bauer (Petra.Bauer@hhu.de)

14 § Present address: Umeå Plant Science Centre (UPSC), Department of Forest Genetics  
15 and Plant Physiology, Swedish University of Agricultural Sciences, 90183 Umeå,  
16 Sweden

17 The author responsible for distribution of materials integral to the findings presented in  
18 this article in accordance with the policy described in the Instructions for Authors  
19 (<https://academic.oup.com/plcell/pages/General-Instructions>) is: Petra Bauer  
20 (Petra.Bauer@hhu.de).

21 **Highlights**

- 22 • FIT undergoes light-induced condensation and localizes to NBs, likely via LLPS  
23 • Functionally relevant Ser271/272 defines an intrinsically disordered region and  
24 influences NB formation dynamics  
25 • NBs are preferential sites for FIT dimerization with FIT and bHLH039, dependent  
26 on Ser271/272  
27 • FIT NBs colocalize with NB markers related to splicing and light signalling

28 **Keywords**

29 anisotropy, bHLH039, condensates, FIT, FRAP, FRET-FLIM, IDR, LLPS, nuclear body,  
30 photobody, speckle, SR45

31 **Abbreviations**

|    |         |                                                       |
|----|---------|-------------------------------------------------------|
| 32 | bHLH    | basic helix-loop-helix                                |
| 33 | bHLH039 | BASIC HELIX-LOOP-HELIX039                             |
| 34 | C       | mCherry                                               |
| 35 | FIT     | FER-LIKE IRON DEFICIENCY-INDUCED TRANSCRIPTION FACTOR |
| 36 | FLIM    | fluorescence lifetime imaging microscopy              |
| 37 | FRAP    | fluorescence recovery after photobleaching            |
| 38 | FRET    | fluorescence resonance energy transfer                |
| 39 | G       | GFP                                                   |
| 40 | GFP     | GREEN FLUORESCENT PROTEIN                             |
| 41 | IDR     | intrinsically disordered region                       |
| 42 | LLPS    | liquid-liquid phase separation                        |
| 43 | mCherry | monomeric Cherry                                      |
| 44 | mRFP    | monomeric RED FLUORESCENT PROTEIN                     |
| 45 | NB      | nuclear body                                          |
| 46 | NP      | nucleoplasm                                           |
| 47 | PB      | photobody                                             |
| 48 | R       | mRFP                                                  |
| 49 | TF      | transcription factor                                  |

50 **Abstract**

51           Several nuclear proteins undergo condensation. The question remains often  
52 whether this property is coupled to a functional aspect of the protein in the nucleus. The  
53 basic helix-loop-helix (bHLH) FER-LIKE IRON DEFICIENCY-INDUCED  
54 TRANSCRIPTION FACTOR (FIT) integrates internal and external signals to control the  
55 amount of iron that is acquired in accordance with growth. The previously described C-  
56 terminal Ser271/272 allows FIT to form active complexes with subgroup Ib bHLH factors  
57 such as bHLH039. FIT has lower nuclear mobility than mutant FITmSS271AA, but this  
58 behavior has remained mechanistically and functionally obscure. Here, we show that FIT  
59 undergoes a light-inducible subnuclear partitioning into nuclear condensates that we  
60 termed FIT nuclear bodies (NBs). The characteristics of FIT NBs could be examined using  
61 a standardized FIT NB analysis procedure coupled with different types of quantitative and  
62 qualitative microscopy-based approaches. We found that FIT condensates were likely  
63 formed by liquid-liquid phase separation. FIT accumulated preferentially in FIT NBs versus  
64 nucleoplasm when engaged in protein complexes with itself and with bHLH039.  
65 FITmSS271AA, instead, localized to NBs with different dynamics. FIT colocalized with  
66 splicing and light signaling NB markers. Hence, the inducible highly dynamic FIT  
67 condensates link active transcription factor complexes with posttranscriptional regulation  
68 processes.

## 69 **Introduction**

70 As sessile organisms, plants must adjust to an ever-changing environment. Read-  
71 out of environmental cues and rapid acclimation are necessary to ensure the plant's  
72 vitality. Accordingly, plants control micronutrient uptake. Overaccumulation causes  
73 toxicity but lack of a micronutrient leads to deficiency symptoms. Even though iron is one  
74 of the most abundant elements in the soil, its bioavailability as micronutrient is limited in  
75 most soils, rendering iron uptake a challenge for plants (Römheld and Marschner, 1986;  
76 Wedepohl, 1995).

77 An essential regulatory protein needed for iron acquisition is the basic helix-loop-  
78 helix (bHLH) transcription factor (TF) FER-LIKE IRON DEFICIENCY-INDUCED  
79 TRANSCRIPTION FACTOR (FIT; Colangelo and Guerinot, 2004; Jakoby et al., 2004;  
80 Yuan et al., 2005; Bauer et al., 2007). FIT is activated upon iron deficiency downstream  
81 of a cascade of bHLH TFs (Zhang et al., 2015; Li et al., 2016; Liang et al., 2017; Kim et  
82 al., 2019; Gao et al., 2020) and of a calcium-sensing protein kinase able to target  
83 phosphorylation site Ser271/272 of FIT (Gratz et al., 2019). FIT alone is not sufficient to  
84 upregulate iron acquisition, while it is active in a heterodimeric complex together with a  
85 member of the bHLH subgroup Ib such as bHLH039 (Yuan et al., 2008; Wang et al., 2013).  
86 Furthermore, FIT action is regulated through protein-protein contacts with multiple key  
87 players of hormonal and abiotic stress signaling pathways (Lingam et al., 2011; Le et al.,  
88 2016; Wild et al., 2016; Cui et al., 2018; Gratz et al., 2019, 2020). Thus, FIT behaves as  
89 a regulatory hub in root cells that perceives external and internal cues to adjust iron  
90 acquisition with growth (Schwarz and Bauer, 2020; Kanwar et al., 2021).

91 The subcellular localization of the FIT-bHLH039 module is remarkable. bHLH039  
92 alone is inactive and present mainly close to the plasma membrane in cytoplasmic foci,  
93 while bHLH039 together with FIT localizes in the nucleus (Trofimov et al., 2019). FIT is  
94 predominately localized in the nucleus but not as mobile compared to mutant  
95 FITmSS271AA, that is a less active mutant form of FIT (Gratz et al., 2019). Subcellular  
96 partitioning of proteins involved in nutrient uptake has until now not been enough in the  
97 focus of research to understand the significance of the differing subcellular localization  
98 patterns.

99 One prominent type of subnuclear partitioning is conferred by biomolecular  
100 condensates, or nuclear bodies (NBs). NBs are membraneless, nuclear  
101 subcompartments, which can be of stable or dynamic nature. To form condensates,

102 proteins need to have particular features that enable protein interactions and compaction  
103 in three-dimensional space. IDRs are flexible protein regions that allow conformational  
104 changes, and thus various interactions, leading to the required multivalency of a protein  
105 for condensate formation (Tarczewska and Greb-Markiewicz, 2019; Emenecker et al.,  
106 2020). As Arabidopsis TFs are enriched in IDRs (Strader et al., 2022) it is not unlikely that  
107 the resulting multivalency in TFs drives condensation and results in microenvironments  
108 for interaction, probably more often than so far studied. IDRs are particularly characteristic  
109 in bHLH TFs in vertebrates and invertebrates (Tarczewska and Greb-Markiewicz, 2019),  
110 suggesting that this feature may also be relevant for the bHLH TFs of plants. One  
111 possibility for condensates to form is to undergo liquid-liquid phase separation (LLPS). In  
112 this process, a solution is demixed into two or more phases (Emenecker et al., 2020). This  
113 mechanism has been examined in simplified *in vitro* systems, but the involvement of  
114 different cell components renders the mechanism more complex *in vivo* (Fang et al., 2019;  
115 Riback et al., 2020; Zhu et al., 2021).

116 NBs comprise an immense variety of types, and plants and animals share several  
117 of them, e.g. the nucleolus, Cajal bodies, and speckles. The nucleolus is involved in  
118 transcription of ribosomal DNA, processing of ribosomal RNA, and ribosome biogenesis  
119 (Kalinina et al., 2018; Lafontaine et al., 2021). Nucleoli share components and function  
120 with Cajal bodies, which are e.g. ribonucleoproteins and RNA processing (Love et al.,  
121 2017; Trinkle-Mulcahy and Sleeman, 2017). Speckles are known spliceosomal sites  
122 (Reddy et al., 2012; Galganski et al., 2017). Plant-specific NBs are photobodies (PBs),  
123 which are triggered by light, temperature, and circadian clock (Pardi and Nusinow, 2021).  
124 PBs harbor regulatory complexes of the photomorphogenic responses, including  
125 photoreceptors like phytochromes (phy) and bHLH TFs belonging to the  
126 PHYTOCHROME INTERACTING FACTORS (PIFs; Pardi and Nusinow, 2021). Another  
127 trigger for inducible condensate formation is temperature (Jung et al., 2020; Zhu et al.,  
128 2021).

129 NBs may act as hubs integrating environmental signals (Emenecker et al., 2020;  
130 Meyer, 2020). Especially PBs may combine external cues, such as light, as an input signal  
131 to steer developmental processes (Kaiserli et al., 2015; Meyer, 2020; Pardi and Nusinow,  
132 2021). It is proposed that the formation of NBs could be an ancient mechanism for spatial  
133 organization within the nucleus (Emenecker et al., 2020). As more evidence on

134 condensation in plants arises, this topic remains barely examined in the scope of plant  
135 nutrition.

136 The motivation for our study was to elucidate the mechanism behind subcellular  
137 distribution and nuclear mobility of FIT. We had found an interesting hint that FIT may  
138 undergo light-inducible nuclear condensation, when we detected FIT nuclear bodies  
139 (NBs). We developed a standardized FIT NB analysis procedure and applied it to  
140 characterize quantitative and qualitative aspects of the dynamic NB formation using  
141 different microscopy-based techniques. Thereby, we were able to link FIT NB formation  
142 with the activity status of FIT to form functional protein complexes. We found that splicing  
143 and light signaling were also associated with FIT NBs. Thus, this study lays ground for  
144 FIT NBs being regulatory hubs steering nutritional signalling, and associating functional  
145 significance to FIT protein condensate formation.

## 146 **Results**

### 147 **FIT localizes to NBs in light-inducible and dynamic manner likely as a result of LLPS**

148 The TF FIT has a dynamic mobility and capacity to form TF complexes inside plant  
149 cells (Gratz et al., 2019; Trofimov et al., 2019). To explore possible mechanisms for  
150 dynamic FIT subcellular localization, we performed a microscopic study on FIT-GFP  
151 protein localization in the root epidermis of the root differentiation zone of 5-d-old iron-  
152 deficient seedlings of *Arabidopsis thaliana* (Arabidopsis), where FIT is active and iron  
153 acquisition occurs (35S<sub>pro</sub>:FIT-GFP complemented *fit-3*; Jakoby et al., 2004; Gratz et al.,  
154 2019). At first microscopic inspection, FIT-GFP was evenly distributed within the nucleus.  
155 After a lag time, FIT-GFP became re-localized at the subnuclear level (**Figure 1A**).  
156 Discrete FIT-GFP nuclear spots were visible after 40 min earliest, sometimes taking up to  
157 2 h to appear. One to four spots were observed per nucleus. Nuclear FIT-GFP spots were  
158 triggered by exposure of whole seedlings to 488 nm laser for several minutes. The  
159 observation of FIT nuclear spots in the root epidermis of the root differentiation zone was  
160 very interesting, suggesting that these might perhaps be NBs containing FIT. However,  
161 further inspection of the nuclear spots in root cells in this differentiating root zone was  
162 hampered by several difficulties, namely the small size and low accessibility of the  
163 nucleus, comparably low level of expression of FIT in roots (see also Lingam et al., 2011;  
164 Meiser et al., 2011), and especially considering the long lag time for detecting the nuclear  
165 spots. These factors made it impossible for us to apply quantitative fluorescence

166 microscopy techniques to draw validated conclusions on the nature, dynamics, and  
167 functional significance of nuclear spots in root epidermis cells of the root differentiation  
168 zone of iron-deficient seedlings.

169 FIT-GFP that was transiently expressed in *Nicotiana benthamiana*  
170 (*N. benthamiana*) leaf epidermis cells under a  $\beta$ -estradiol-inducible promoter to control  
171 protein expression showed a very similar re-localization of FIT-GFP into nuclear spots as  
172 observed in the Arabidopsis root epidermis, again triggered by treatment with a 488 nm  
173 laser light stimulus. Differences were, however, the duration of the lag time needed to  
174 observe this phenomenon, and the number of nuclear spots. As in Arabidopsis, FIT-GFP  
175 localized initially in uniform manner to the entire nucleus ( $t=0$ ) of *N. benthamiana* leaf  
176 epidermis cells. A short duration of 1 min 488 nm laser light excitation induced the  
177 formation of FIT-GFP signals in discrete spots inside the nucleus after a lag time of only  
178 five minutes ( $t=5$ ; **Figure 1B and Supplemental Movie S1A**). The nuclear FIT spots were  
179 systematically initiated, and nearly all nuclei in the imaged leaf disk showed numerous  
180 spots. A similar laser light excitation procedure was previously found to elicit PB formation  
181 of cryptochrome2 (CRY2) in Arabidopsis protoplasts and HEK293T cells (Wang et al.,  
182 2021). We deduced that the spots of FIT-GFP signal were NBs. FIT NB formation was not  
183 dependent on the fluorescent tag, as it was similar for FIT-mCherry when co-excited with  
184 488 nm laser light (**Figure 1C**). Another TF and interactor of FIT, ZINC FINGER OF  
185 ARABIDOPSIS THALIANA12-GFP (ZAT12-GFP; Le et al., 2016), did not localize to NBs  
186 under the same imaging conditions (**Figure 1D and Supplemental Movie S1B**).  
187 Therefore, we concluded that FIT localization to NBs was a specificity of FIT and that  
188 formation of FIT NBs was not artificially caused by fluorescent tags or the imaging setup.  
189 Importantly, the *N. benthamiana* epidermis expression system was suited to control the  
190 parameters for light-induced triggering of FIT NBs and their quantitative analysis by  
191 fluorescence microscopy. We then developed a standardized experimental procedure for  
192 qualitative and quantitative FIT NB analysis in *N. benthamiana* (hereafter named  
193 'standardized FIT NB analysis procedure'; **Supplemental Figure S1**).

194 Liquid-liquid phase separation (LLPS) is a possible way for condensate formation,  
195 and liquid-like features are quantifiable by mobility and shape analysis within condensates  
196 (Shin et al., 2017; Wang et al., 2021). We used the standardized FIT NB analysis  
197 procedure to examine whether this could also be a mechanism underlying the FIT NB  
198 formation. Mobility of FIT NBs was tested with the fluorescence recovery after



199 photobleaching (FRAP) approach (Bancaud et al., 2010; Trofimov et al., 2019) by  
200 recording the recovery of the fluorescence intensity over time in a bleached NB  
201 (**Figure 1E-G**). According to relative fluorescence intensity the fluorescence signal  
202 recovered to a high extent with FIT NBs (**Figure 1F**), and the calculated mobile fraction  
203 of the NB protein was on average 80% (**Figure 1G**). Shape analysis of FIT NBs showed  
204 that the NBs reached a high circularity score (**Figure 1H**). According to Wang et al. (2021),  
205 fluorescence recovery and circularity scores as the ones measured for FIT NBs reflect  
206 high mobility and circular shape. Thus, FIT NBs behave in a liquid-like manner suggesting  
207 that LLPS might be the mechanism leading to FIT NB formation.

208 In summary, the developed standardized FIT NB analysis procedure was well  
209 suited for investigating dynamic properties of light-induced FIT NBs and characterizing  
210 them as the likely result of LLPS. Because of these properties, it is justified to term them  
211 'FIT NBs'. We hypothesized that NB formation is a feature of the FIT protein that provides  
212 regulatory specificity, and we subsequently investigated this hypothesis using the  
213 developed standardized FIT NB analysis procedure in all subsequent assays below.

#### 214 **FIT forms homodimeric complexes preferentially in NBs, dependent on Ser271/272**

215 Next, we asked which properties of the FIT protein enable NB formation. Residue  
216 Ser271/272 is important for the homo- and heterodimerization capacity of FIT (Gratz et  
217 al., 2019). We therefore asked whether this site has an influence on FIT NB formation,  
218 and we compared the ability for NB formation of mutant FITmSS271AA-GFP with that of  
219 wild-type FIT-GFP protein.

220 FITmSS271AA-GFP also localized to NBs, however with different dynamics. The  
221 formation of FITmSS271AA NBs was delayed in time (**Figure 2A**;  $t=15$  instead of  $t=5$ ).  
222 While FIT-GFP NB formation started in the first minutes after excitation (**Supplemental**  
223 **Movie S1A**), FITmSS271AA-GFP NB formation occurred earliest 10 min after excitation  
224 (**Supplemental Movie S1C**). In addition, NB number and size of FITmSS271AA-GFP  
225 were decreased in comparison to the ones from wild-type FIT-GFP (**Figure 2, B and C**).  
226 Hence, the dynamics of NB formation were dependent on Ser271/272.

227 The process of condensation is facilitated when proteins possess IDRs, since,  
228 importantly, IDRs may engage in numerous interactions in space due to rapid  
229 conformational changes (Tarczewska and Greb-Markiewicz, 2019; Emenecker et al.,  
230 2020). The three-dimensional conformation of wild-type FIT had predicted stretches of

231 intrinsic disorganization, peaking before and at the basic region of the bHLH domain, and  
232 two in the C-terminal part, one of them around the Ser271/272 site (termed IDR<sup>Ser271/272</sup>;  
233 **Supplemental Figure S2A**). In contrast, in the FITmSS271AA mutant this C-terminal  
234 region was no longer classified as IDR (**Supplemental Figure S2B**). This underlined the  
235 significance of the Ser271/272 site, not only for interaction but also for FIT NB formation.

236 We then tested whether FIT homodimerization was preferentially associated with  
237 NB formation. For that, we investigated whether FIT-GFP shows a differentiated  
238 homodimerization strength, first, inside the NBs versus the nucleoplasm (NP), and  
239 second, as wild-type FIT versus the mutant FITmSS271AA-GFP protein by performing  
240 anisotropy (or homo-FRET) measurements. Energy transfer between the same kind of  
241 fluorescently tagged proteins leads to depolarization of the emitted light (Stahl et al., 2013;  
242 Weidtkamp-Peters et al., 2022). Fluorescence anisotropy (FA) describes this  
243 depolarization and gives hints on the dimerization and oligomerization status of a protein  
244 as the FA value decreases (**Figure 3A**). We measured FA before (t=0) and after NB  
245 formation (t=5 for FIT and t=15 for FITmSS271AA), and analyzed the homodimerization  
246 strength for the whole nucleus, the NBs, and the residual NP (**Figure 3B-D**). Free GFP  
247 and GFP-GFP constructs were used as references for monomers and dimers (**Figure 3C**  
248 **and D**).

249 Whole nucleus FA values were lower at t=5 than at t=0 for FIT-GFP. Additionally,  
250 FA values were lower within the NBs compared to the NP (**Figure 3C**). Compared to wild-  
251 type FIT-GFP, FA values were not reduced for mutant FITmSS271AA-GFP at t=15  
252 compared to t=0. Also, the FA values did not differ between NBs and NP for the mutant  
253 protein (**Figure 3D**). This indicated the presence of homodimeric FIT complexes in NBs.

254 In summary, wild-type FIT had better capacities to localize to NBs than mutant  
255 FITmSS271AA, presumably due its IDR<sup>Ser271/272</sup> at the C-terminus. NBs were nuclear sites  
256 in which FIT formed preferentially homodimeric protein complexes.

### 257 **FIT-bHLH039 interaction complexes preferentially accumulate in FIT NBs**

258 FIT engages in protein-protein interactions with bHLH039 to steer iron uptake  
259 target gene induction in the nucleus, while mutant FITmSS271AA protein is less active in  
260 interacting with bHLH039 (Gratz et al., 2019). Hence, we tested whether FIT also interacts  
261 with bHLH039 preferentially inside NBs and whether mutant FITmSS271AA differs in this  
262 ability from wild-type FIT protein. bHLH039 alone does not localize inside the nucleus but

263 requires FIT for nuclear localization (Trofimov et al., 2019), so that bHLH039 was not used  
264 alone to test its subnuclear localization.

265 Upon co-expression, FIT-GFP and bHLH039-mCherry colocalized fully in NBs that  
266 resembled the previously described FIT NBs. In the beginning, both proteins were  
267 uniformly distributed within the nucleus ( $t=0$ ), and later became localized in NBs ( $t=5$ ;  
268 **Figure 4A**).

269 We then examined the heterodimerization strength of FIT-GFP and bHLH039-  
270 mCherry, and FITmSS271AA-GFP and bHLH039-mCherry by FRET-fluorescence  
271 lifetime imaging microscopy (FRET-FLIM) measurements. In case of protein interaction  
272 (close proximity,  $\leq 10$  nm), energy transfer between a fluorescently tagged donor and a  
273 fluorescently tagged acceptor decreases the fluorescence lifetime of the donor  
274 (**Figure 4B**; Borst and Visser, 2010; Weidtkamp-Peters and Stahl, 2017). We quantified  
275 the fluorescence lifetime of FIT-GFP and FITmSS271AA-GFP respective of  
276 heterodimerization before ( $t=0$ ) and after NB formation ( $t=5$  for FIT and  $t=15$  for  
277 FITmSS271AA) in the whole nucleus, in NBs, and in the NP (**Figure 4C-E**). FIT-GFP and  
278 FITmSS271AA-GFP (donor only) served as negative controls.

279 Fluorescence lifetime was decreased for the pair FIT-GFP and bHLH039-mCherry  
280 at  $t=5$  within NBs compared to all other measured areas (**Figure 4D**). In contrast to that,  
281 the fluorescence lifetime decrease for the pair FITmSS271AA-GFP and bHLH039-  
282 mCherry at  $t=15$  was not different between NBs and NP (**Figure 4E**). This indicated that  
283 heterodimeric complexes accumulated preferentially in FIT NBs.

284 In summary, heterodimerization of FIT with bHLH039 was spatially concentrated in  
285 NBs versus the remaining nuclear space and was less prominent for FITmSS271AA.  
286 Hence, the capacity of FIT to form an active TF complex was coupled with its presence in  
287 NBs. The occurrence of FIT homo- and heterodimerization preferentially in NBs suggests  
288 that FIT protein interaction may drive condensation. We therefore concluded that FIT NBs  
289 may be sites with active TF complexes for iron deficiency response regulation.

## 290 **FIT NBs colocalize with speckle components**

291 Numerous NB types are known, and they are associated with particular proteins  
292 that are indicative of the NB type. To further understand the identity, dynamics, and  
293 function of FIT NBs, we co-expressed FIT-GFP with seven different NB markers from The  
294 Plant Nuclear Marker collection (NASC) and observed NB formation and protein

295 colocalization before (t=0) and after FIT NB formation (t=5). In cases where we detected  
296 a colocalization with FIT-GFP, we analyzed the localization of NB markers also in the  
297 single expression at t=0 and at t=5 after the 488 nm excitation, to detect potentially  
298 different patterns in single and co-expression.

299 All seven NB markers were expressed together with FIT-GFP, and according to the  
300 resulting extent of colocalization we subdivided them into three different types. The first  
301 type (type I) did not colocalize with FIT-GFP neither at t=0 nor at t=5. This was the case  
302 for the Cajal body markers coilin-mRFP and U2 snRNP-specific protein U2B"-mRFP  
303 (**Supplemental Figure S3**; Lorković et al., 2004; Collier et al., 2006). Coilin-mRFP  
304 localized into a NB within and around the nucleolus (**Supplemental Figure S3A**). The  
305 NBs of U2B"-mRFP were also close to the nucleolus (**Supplemental Figure S3B**).  
306 Hence, FIT-GFP was not associated with Cajal bodies.

307 The second type (type II) of NB markers were partially colocalized with FIT-GFP.  
308 This included the speckle components ARGININE/SERINE-RICH45-mRFP (SR45) and  
309 the serine/arginine-rich matrix protein SRm102-mRFP. SR45 is involved in splicing and  
310 alternative splicing and is part of the spliceosome in speckles (Ali et al., 2003), and was  
311 recently found to be involved in splicing of iron homeostasis genes (Fanara et al., 2022).  
312 SRm102 is a speckle component (Kim et al., 2016). SR45-mRFP localized barely in the  
313 NP but inside few and very large NBs that remained constant at t=0 and t=5. FIT-GFP did  
314 not colocalize in those NBs at t=0, however, it colocalized with the large SR45-mRFP NBs  
315 at t=5 (**Figure 5A**). FIT-GFP also localized in typical FIT NBs in the residual NP at t=5  
316 (**Figure 5A**). SRm102-mRFP showed low expression in the NP and stronger expression  
317 in a few NBs that also remained constant at t=0 and t=5. FIT-GFP colocalized with  
318 SRm102-mRFP in only few instances at t=5, but not t=0, while most FIT NBs did not  
319 colocalize with SRm102-mRFP NBs (**Figure 5B**). Both SR45-mRFP and SRm102-mRFP  
320 had the same localization pattern at t=0 and t=5, irrespective of FIT-GFP co-expression  
321 or 488 nm excitation (**Supplemental Figure S4**). These type II NB markers seemed to  
322 recruit FIT-GFP into NBs after 488 nm excitation that were present (pre-existing) before  
323 FIT-GFP NB formation, while FIT-GFP localized additionally in separate FIT NBs. Hence,  
324 FIT became associated with splicing components and speckles upon the light trigger.

325 A third type (type III) of three NBs markers, namely UAP56H2-mRFP, P15H1-  
326 mRFP, and PININ-mRFP, were fully colocalized with FIT-GFP. Until now, these NB  
327 marker proteins are not well described in plants. UAP56H2 is a RNA helicase, which is

328 involved in mRNA export (Kammel et al., 2013). P15H1 was found as a putative  
329 Arabidopsis orthologue of an exon junction complex component in humans (Pendle et al.,  
330 2005), while PININ has a redundant role to its paralogue apoptotic chromatin  
331 condensation inducer in the nucleus (ACINUS) in alternative splicing (Bi et al., 2021).  
332 UAP56H2-mRFP and P15H1-mRFP did not localize in NBs and were not responsive to  
333 the 488 nm excitation when expressed alone or together with FIT-GFP at t=0 (**Figure 6,**  
334 **A and B and Supplemental Figure S4, C and D**). When co-expressed with FIT-GFP and  
335 following the 488 nm excitation, at t=5, the two NB markers adopted the FIT NB pattern  
336 and colocalized with FIT-GFP in FIT NBs (**Figure 6, A and B**). PININ-mRFP was also  
337 uniformly distributed in the nucleus at t=0 like FIT-GFP and fully colocalized with FIT NBs  
338 at t=5 (**Figure 6C**). But curiously, PININ-mRFP showed a very different localization in the  
339 single expression. Predominately, it localized to a very large NB besides several small  
340 NBs with no expression in the NP at t=0 and at t=5 (**Supplemental Figure S4E**). Thus,  
341 FIT-GFP recruited these type III NB marker and speckle proteins fully into FIT NBs. Since  
342 type III NB markers are also potentially involved in splicing and mRNA export from the  
343 nucleus, these same functions may be relevant in FIT NBs.

344 Taken together, the colocalization studies underlined the dynamic behavior of  
345 inducible FIT NB formation. FIT NBs had a speckle function, in which on the one hand FIT  
346 was recruited itself into pre-existing splicing-related NBs (SR45-mRFP and SRm102-  
347 mRFP, type II), while on the other hand it also recruited speckle-localized proteins into  
348 FIT NBs (UAP56H2-mRFP, P15H1-mRFP, and PININ-mRFP, type III).

### 349 **PB components influence FIT NB localization and formation**

350 PBs are plant-specific condensates which harbor various light signaling  
351 components (Kircher et al., 2002; Bauer et al., 2004). Among them are the bHLH TFs of  
352 the PIF family. As key regulators of photomorphogenesis, they integrate light signals in  
353 various developmental and physiological response pathways (Leivar and Monte, 2014;  
354 Pham et al., 2018). Indeed, PIF4 may control iron responses in Arabidopsis based on  
355 computational analysis of iron deficiency response gene expression networks  
356 (Brumbarova and Ivanov, 2019). We tested in the same manner as described above for  
357 NB markers, whether FIT NBs coincide with two of the described PB markers, PIF3-  
358 mCherry and PIF4-mCherry (Van Buskirk et al., 2014; Qiu et al., 2019, 2021).



359 We detected distinct localization patterns for PIF3-mCherry and PIF4-mCherry. At  
360  $t=0$ , PIF3-mCherry was predominantly localized in a single large PB (**Figure 7A**). In  
361 general, localization of single expressed PIF3-mCherry remained unchanged at  $t=0$  and  
362  $t=15$  (**Supplemental Figure S5A**). Upon co-expression, FIT-GFP was initially not present  
363 in PIF3-mCherry PB at  $t=0$ . After 488 nm excitation and at  $t=5$ , FIT NBs were still not  
364 visible. Instead, FIT-GFP accumulated and finally colocalized with the large PIF3-mCherry  
365 PB at  $t=15$ , while the typical FIT NBs did not appear (**Figure 7A**).

366 PIF4-mCherry localized in two different patterns, and both differed substantially  
367 from that of PIF3-mCherry. In the one pattern at  $t=0$ , PIF4-mCherry was not localized to  
368 any PBs, but instead was uniformly distributed in the NP as was the case for FIT-GFP.  
369 Such a pattern was also seen at  $t=15$ , and then neither PIF4-mCherry nor FIT-GFP were  
370 localized in any PBs/NBs (**Figure 7B**). In the other pattern, PIF4-mCherry and FIT-GFP  
371 localized in multiple PBs at  $t=0$  and  $t=15$ , whereas none of them corresponded  
372 morphologically to the typical FIT NBs (**Figure 7C**). The same two localization patterns  
373 were also found for PIF4-mCherry in the single expression, whereby 488 nm excitation  
374 did not alter PIF4-mCherry localization (**Supplemental Figure S5, B and C**).

375 Hence, FIT was able to localize to PBs when co-expressed with PIF3 and PIF4,  
376 raising the possibility that FIT is a key regulator to cross-connect iron acquisition regulation  
377 and light signaling pathways.

## 378 **Discussion**

379 In this study, we uncovered a previously unknown phenomenon, the light-induced  
380 accumulation of FIT condensates in FIT NBs. LLPS was most likely the underlying  
381 mechanism for this highly dynamic process. FIT NBs were enriched in active FIT TF  
382 complexes for iron deficiency gene regulation. FIT associated with speckles and PBs in a  
383 highly dynamic fashion. Based on these data, FIT NBs are dynamic microenvironments  
384 with active FIT TF complexes that possibly are hubs to cross connect transcriptional iron  
385 deficiency gene expression with post-transcriptional regulation and light signaling.

## 386 **A standardized procedure for FIT NB induction was crucial to delineate the** 387 **characteristics of FIT NBs in reliable manner**

388 A major aim of this study was to characterize the nature and potential function of  
389 light-induced FIT NBs. To be able to apply the quantitative microscopy-based techniques,  
390 we needed to control the appearance of NBs in reliable manner and FIT-GFP fluorescence

391 needed to be sufficiently strong. This was clearly a limitation for inspection of root  
392 epidermis cells of the root differentiation zone in iron-deficient plants in which FIT-  
393 controlled iron uptake takes place. Not every root epidermis cell showed NBs and only  
394 few FIT NBs were detectable after a delay of 40 min to 2 h. Since condensation depleted  
395 FIT protein in the nucleoplasm, the remaining low FIT protein concentration can be the  
396 reason why FIT NBs remained few in number in the Arabidopsis root cells. The  
397 *N. benthamiana* protein expression system did not present these limitations and high-  
398 quality measurement data were obtained for all experimental series. Furthermore, this  
399 expression system is a well-established and widely utilized system in plant biology (Martin  
400 et al., 2009; Bleckmann et al., 2010; Leonelli et al., 2016; Burkart et al., 2022). The  
401 developed standardized assay generated reliable and accurate data for statistical analysis  
402 and quantification to conclude about FIT NB characteristics.

403 Condensation likely explains the reduced mobility of FIT-GFP versus  
404 FITmSS271AA-GFP seen in a previous study (Gratz et al., 2019). In liquid state,  
405 condensates are still more mobile than in the solid one. According to FRAP data, FIT NBs  
406 maintained a dynamic exchange of FIT protein with the surrounding NP. FIT NBs were  
407 also mostly of circular shape. Circular condensates appear as droplets, in contrast to solid-  
408 like condensates that are irregularly shaped (Shin et al., 2017). These two characteristics  
409 speak in favour of liquid-like features, suggesting that LLPS underlies FIT NB formation.  
410 A similar situation was described for CRY2 PBs, which were also of circular shape with  
411 mobile protein inside PBs (Wang et al., 2021). bHLH039 was found accumulated in  
412 cytoplasmic foci at the cell periphery (Trofimov et al., 2019). In such foci, bHLH039 was  
413 immobile, and we suspect it was in a non-functional state in the absence of FIT. This  
414 underlines the understanding that liquid condensates such as FIT NBs are dynamic  
415 microenvironments, whereas immobile condensates point rather towards a solid and  
416 pathological state (Shin et al., 2017).

417 In conclusion, the properties of liquid condensation along with the findings that it  
418 occurred irrespective of the fluorescence protein tag preferentially with wild-type FIT, but  
419 with different dynamics for the mutant FITmSS271AA and not at all for ZAT12, allowed us  
420 to coin the term of 'FIT NBs'.

421 **IDR<sup>Ser271/272</sup> was crucial for interaction and NB formation of FIT**

422 FIT NBs were hotspots for FIT interaction, allowing to assume that they are  
423 integrated in the iron deficiency response as interaction hubs. FIT formed homodimers  
424 and heterodimers with bHLH039 preferentially in NBs compared with the NP. These  
425 abilities distinguished wild-type FIT and mutant FITmSS271AA. According to these  
426 findings FITmSS271AA was less successful in interacting within NBs, indicating that wild-  
427 type FIT is a multivalent protein and IDR<sup>Ser271/272</sup> is important for that. bHLH proteins  
428 interact with other proteins via the helix-loop-helix interface, which may certainly also be  
429 the case for FIT. Our study supports previous reports that FIT protein interaction via its C-  
430 terminus is relevant (Lingam et al., 2011; Le et al., 2016; Gratz et al., 2019). The property  
431 of being able to interact via the HLH and via the C-terminal domain allows FIT to be  
432 multivalent. It could not be distinguished whether FIT homodimers were a prerequisite for  
433 the localization of bHLH039 in NBs or whether FIT-bHLH039 complexes also initiated NBs  
434 on their own.

435 The predicted C-terminal FIT IDR<sup>Ser271/272</sup> was relevant for NB formation capacity.  
436 IDRs are often required for protein interactions of hub proteins since the flexible IDRs  
437 adapt to interactions with multiple protein partners and are therefore crucial for  
438 multivalency (Tarczewska and Greb-Markiewicz, 2019; Emenecker et al., 2020; Salladini  
439 et al., 2020). Besides, evidence exists that the amino acid composition of IDRs is crucial  
440 for condensation (Powers et al., 2019; Emenecker et al., 2021; Huang et al., 2022). Very  
441 interestingly, posttranslational modification in form of phosphorylation within IDRs is  
442 suggested to be a mechanism to regulate condensate formation (Owen and Shewmaker,  
443 2019). Ser271/272 is targeted by a FIT-interacting protein kinase that was shown to affect  
444 FIT activity *in vivo* and FIT phosphorylation *in vitro* (Gratz et al., 2019). Hence,  
445 phosphorylation of Ser271/272 might perhaps be a trigger for NB formation *in vivo*.

446 **Formation of FIT NB could happen *de novo* but also associate with pre-existing**  
447 **condensates in the nucleus**

448 FIT may have formed FIT NBs as entirely newly formed structures upon the light  
449 trigger. But it is also possible that FIT joined pre-existing NBs, which then became the  
450 structures we termed FIT NBs. Partial or full colocalization of FIT-GFP with NB and PB  
451 markers revealed the remarkably high and intriguing dynamic nature of FIT NBs and  
452 suggests that both possibilities are plausible. FIT NBs are light-triggered, and this speaks



453 in favor of pre-existing NBs. Since FIT does not possess light-responsive domains, it is  
454 most likely that a light-responsive protein must be inducing FIT NB formation. The basic  
455 leucine zipper TF ELONGATED HYPOCOTYL5 (HY5) could be a good candidate, since  
456 HY5 is a mobile protein involved in iron acquisition in tomato (Gao et al., 2021; Guo et al.,  
457 2021). Possibly activation and condensation involve not only the studied NB and PB  
458 markers but also potentially signaling proteins or further scaffold proteins that are part of  
459 the multivalent protein complexes in FIT NBs. On the other hand, FIT-GFP accumulated  
460 not only in FIT NBs but also in the pre-existing NBs with type II NB markers (SR45 and  
461 SRm102) after the FIT NB induction procedure. In this respect, type II markers were  
462 similar to PIF3 and PIF4. FIT-GFP was recruited to pre-existing PBs and again only after  
463 the light trigger. Interestingly, typical FIT NB formation did not occur in the presence of PB  
464 markers, indicating that they must have had a strong effect on recruiting FIT. Overall, the  
465 dynamics of FIT colocalization with type II NB and PB markers suggest that these  
466 condensates dictated FIT condensation in their own pre-existing NBs/PBs. This recruiting  
467 process could be navigated via protein-protein interaction since this is the driving force of  
468 condensation (Kaiserli et al., 2015; Emenecker et al., 2020).

469 Speaking in favor of a *de novo* FIT NB formation is the localization with type III NB  
470 markers. The three fully colocalizing type III NB markers (UAP56H2, P15H1 and PININ)  
471 accumulated only in FIT NBs upon co-expression with FIT and mostly not on their own.  
472 The same was true for bHLH039, that joined FIT in FIT NBs, showing that FIT not only  
473 facilitated bHLH039 nuclear localization (Trofimov et al., 2019) but also condensation.  
474 Interestingly, FIT was able to change PININ nuclear localization. In single expression,  
475 PININ was localized to a major large NB, but in colocalization with FIT it joined the typical  
476 FIT NBs. This suggests that FIT dictates bHLH039 and type III NB markers and highlights  
477 that FIT is also able to set the tone for NB formation. Hence, FIT can recruit other proteins  
478 into NBs, and it is possible that FIT forms its own NBs. Protein-protein interaction could  
479 underly this recruitment, as evident for bHLH039 (Kaiserli et al., 2015; Emenecker et al.,  
480 2020). Ultimately, as a high diversification of condensates exists, a combination of newly  
481 formed NBs and localization to pre-existing NBs cannot be ruled out. Given the variety of  
482 proteins localizing in condensates, effort in isolating FIT NBs and identification of proteins  
483 within FIT NBs is necessary to further uncover the driving forces of FIT NB formation.

## 484 **FIT NBs might have a transcriptional and post-transcriptional function**

485         Since the type II and III markers are splicing components, the colocalization studies  
486 suggest that FIT NBs are speckles. On the one hand, the speckle nature coincides well  
487 with the dynamic nature of FIT NBs. Like FIT NBs, speckles are highly dynamic. They are  
488 forming around transcriptionally active sites in the interchromatin regions recruiting  
489 several protein functions like mRNA synthesis, maturation, splicing and export (Reddy et  
490 al., 2012; Galganski et al., 2017). The type II speckle component SR45, for instance, was  
491 shown to be a highly mobile protein in speckles and required phosphorylation for proper  
492 speckle localization (Ali et al., 2003; Reddy et al., 2012). These processes fit well to the  
493 described FIT NB attributes. On the other hand, speckle components are also linked with  
494 epigenetic mechanisms (Mikulski et al., 2022). The characterization of FIT NBs as  
495 speckles is interesting because regulation of splicing and epigenetic regulation is  
496 associated with iron deficiency gene expression. Genes were spliced incorrectly in a *sr45-*  
497 *1* null mutant Arabidopsis line, and gene expression of *FIT* and FIT target genes was  
498 increased in *sr45-1* seedlings, showing that an interplay between SR45 and the iron  
499 uptake machinery exists (Fanara et al., 2022). Alternative splicing was detected for FIT  
500 targets and the *BHLH* subgroup Ib genes in iron-deficient versus iron-sufficient conditions  
501 (Li et al., 2013). Hence, FIT NBs may regulate iron uptake gene expression at  
502 posttranscriptional level. Notably, PININ (type III), together with ACINUS, were shown to  
503 stabilize SR45 (type II) in plants (Bi et al., 2021). Further, UAP56H2, P15H1, and PININ  
504 (type III) are connected to SR45 and SRm102 (type II) in mammalian cells as all being  
505 part of the exon junction complex and interacting with each other (Lin et al., 2004; Pendle  
506 et al., 2005). This is an interesting parallel, as it suggests that type II and type III marker  
507 localization is conserved across kingdoms, underlying the ancient nature of condensates.  
508 Indeed, SR45 and PININ located to a very large NB in non-induced cells. This opens the  
509 possibility that the two proteins might localize to the same speckle, as also might FIT.  
510 Taken together, the observations confirm the high diversification and complexity of FIT  
511 NBs and speckles (Lorković et al., 2008) and it is tempting to speculate that FIT might  
512 regulate splicing and alternative splicing of its target genes by recruiting speckle  
513 components.

514         *FIT* is itself a direct target of FIT and the FIT-bHLH039 complex (Wang et al., 2007;  
515 Naranjo-Arcos et al., 2017), and perhaps FIT NB speckles appear at the *FIT* transcription  
516 site. Indeed, coupling of transcription with splicing or alternative splicing is an established

517 idea in the mammalian field, and evidence for co-transcriptional splicing in plants is also  
518 recently rising (Nojima et al., 2015; Zhu et al., 2018; Chaudhary et al., 2019). Mediator  
519 complex condensation was shown to drive transcriptional control (Boija et al., 2018) and  
520 interestingly, FIT was also shown to interact with Mediator complexes, directly and  
521 indirectly (Yang et al., 2014; Zhang et al., 2014). Besides, other studies suggest TF  
522 condensation to be involved in transcriptional regulation (Kaiserli et al., 2015; Huang et  
523 al., 2022). Possibly, the basic region of FIT and bHLH039 might be accessible for DNA  
524 binding either within or outside of NBs to regulate target genes (Boija et al., 2018; Brodsky  
525 et al., 2020). In further studies, it will be interesting to analyze whether DNA and mRNA  
526 FIT targets are present inside FIT NBs and whether FIT may also interact directly with  
527 other speckle components.

528 As we focused to characterize the phenomenon, the physiological integration and  
529 regulation of the induction of FIT NB formation can be subject of future studies. The rapid  
530 speed by which FIT NB appeared within 5 min in *N. benthamiana* leaf cells speaks in favor  
531 of protein rearrangement rather than protein synthesis. The long duration of FIT NB  
532 formation after blue light induction in Arabidopsis roots suggests that signal transduction  
533 was more complex and possibly involved intracellular or even cell-to-cell and long-  
534 distance leaf-to-root signaling. In how far a long-distance signal or a signaling cascade  
535 triggered by light is involved in FIT NB formation in roots remains to be investigated, but  
536 CRY1/CRY2 and HY5 are promising candidates for further studies (Gao et al., 2021; Guo  
537 et al., 2021). In order to undergo phase separation, a certain protein concentration must  
538 be reached (Bracha et al., 2018). Since FIT protein is subject of proteasomal turnover in  
539 roots, FIT NB formation may depend on FIT protein interaction partners in roots that need  
540 to be activated (Lingam et al., 2011; Meiser et al., 2011).

541 In summary, FIT engages in protein complexes inside dynamic NBs. FIT NBs  
542 contain active TF complexes for iron acquisition gene expression (**Figure 8A**). FIT NBs  
543 are speckles that link transcriptional with post-transcriptional regulation (**Figure 8B**). The  
544 appearance of FIT NBs is inducible by light, and light-regulated PB components are  
545 connected with FIT NBs and vice versa. It will be interesting in the future to test hormonal  
546 and environmental triggers that may stabilize FIT protein prior to examining the initiation  
547 of FIT NBs in root physiological situations and to investigate the effects on transcriptional  
548 and posttranscriptional regulation of FIT targets.

## 549 **Materials and methods**

### 550 **Plant material and growth conditions**

551 *Arabidopsis thaliana* 2x35S<sub>pro</sub>:FIT-GFP/*fit-3* seedlings (Gratz et al., 2019) were  
552 used for localization studies. Seeds were sterilized and grown upright on Hoagland  
553 medium plates (macronutrients: 1.5 mM Ca(NO<sub>3</sub>)<sub>2</sub> · 4H<sub>2</sub>O, 0.5 mM KH<sub>2</sub>PO<sub>4</sub>, 1.25 mM  
554 KNO<sub>3</sub>, 0.75 mM MgSO<sub>4</sub> · 7H<sub>2</sub>O; micronutrients: 0.075 μM (NH<sub>4</sub>)<sub>6</sub>Mo<sub>7</sub>O<sub>24</sub> · 4H<sub>2</sub>O, 1.5 μM  
555 CuSO<sub>4</sub> · 5H<sub>2</sub>O, 50 μM H<sub>3</sub>BO<sub>3</sub>, 50 μM KCl, 10 μM MnSO<sub>4</sub> · H<sub>2</sub>O, 2 μM ZnSO<sub>4</sub> · 7H<sub>2</sub>O;  
556 1.4 % (w/v) plant agar, 1 % (w/v) sucrose, pH 5.8) with no iron supply for 5 d under long  
557 day conditions (16 h light/8 h dark) at 21°C in a plant chamber (CLF Plant Climatics) under  
558 white light (120 μmol m<sup>-2</sup> s<sup>-1</sup>). *Nicotiana benthamiana* plants for transient protein  
559 expression were grown in the greenhouse facility for approx. 4 weeks under long day  
560 conditions (16 h light/8 h dark).

### 561 **Microscopy of *Arabidopsis thaliana* seedlings**

562 Protein localization studies in roots of 5-d-old seedlings of the *Arabidopsis thaliana*  
563 line 2x35S<sub>pro</sub>:FIT-GFP/*fit-3* (Gratz et al., 2019) were performed with the widefield  
564 microscope ELYRA PS (Zeiss) equipped with a EMCCD camera. Whole seedlings were  
565 exposed to 488 nm laser light for several minutes. GFP was excited with a 488 nm laser  
566 and detected with a BP 495-575 + LP 750 beam splitter. Images were acquired with the  
567 C-Apochromat 63x/1.2 W Korr M27 (Zeiss) objective, pixel dwell time of 1.6 μs and frame  
568 size of 512x512. Pictures were processed with the manufacturer's software ZEN lite  
569 (Zeiss).

### 570 **Generation of fluorescent constructs**

571 All constructs used in this study are listed in **Supplemental Table S1**. Generation  
572 of fluorescent translational C-terminal fusion of PIF3 and PIF4 with mCherry was  
573 performed with Gateway Cloning. CDS of *PIF3* was amplified with the PIF3 GW fw (5'-  
574 GGGGACAAGTTTGTACAAAAAAGCAGGCTATGCCTCTGTTTGAGCTT-3') and PIF3  
575 GW rv (5'-GGGGACCACTTTGTACAAGAAAGCTGGGTCCGACGATCCACAAAAGT-  
576 3') primers, and CDS of *PIF4* was amplified with the PIF4 GW fw (5'-  
577 GGGGACAAGTTTGTACAAAAAAGCAGGCTATGGAACACCAAGGTTGG-3') and PIF4  
578 GW rv (5'-GGGGACCACTTTGTACAAGAAAGCTGGGTCTGGTCCAAACGAGAACC-  
579 3') primers, and introduced into the entry vector pDONR207 via the BP reaction (Life  
580 Technologies) and subsequently into the inducible pABind 35S<sub>pro</sub>:mCherry destination

581 vector (Bleckmann et al., 2010) via the LR reaction (Life Technologies). Finally, *Rhizobium*  
582 *radiobacter* was transformed with the constructs for transient transformation of *Nicotiana*  
583 *benthamiana* leaf epidermal cells.

#### 584 **Transient transformation of *Nicotiana benthamiana* leaf epidermal cells**

585 Transient protein expression was performed in *Nicotiana benthamiana* leaf  
586 epidermal cells according to Bleckmann et al. (2010). This was performed for localization  
587 studies, FRAP measurements, anisotropy (homo-FRET) measurements, FRET-FLIM  
588 measurements, and NB quantification. Cultures of *Rhizobium radiobacter* containing the  
589 construct of interest (**Supplemental Table S1**) were incubated overnight and cell were  
590 pelleted and dissolved in AS medium (250  $\mu$ M acetosyringone (in DMSO), 5 % (w/v)  
591 sucrose, 0.01 % (v/v) silwet, 0.01 % (w/v) glucose). An OD<sub>600nm</sub> of 0.4 was set for all  
592 constructs. A *Rhizobium radiobacter* strain containing the silencing repressor p19 vector  
593 (Shamloul et al., 2014) was used additionally for bHLH039-mCherry to enhance  
594 expression. After 1 h incubation on ice the suspension was infiltrated with a syringe into  
595 the abaxial side of the leaf. *Nicotiana benthamiana* plants were kept under long day  
596 conditions (16 h light/8 h dark) in the laboratory after infiltration. Imaging was performed  
597 2-3 d after infiltration. Expression of constructs with an inducible 35S promoter was  
598 induced 16 h prior to imaging with  $\beta$ -estradiol (20  $\mu$ M  $\beta$ -estradiol (in DMSO), 0.1 % (v/v)  
599 Tween 20).

#### 600 **Confocal microscopy**

601 For localization studies a confocal laser scanning microscope LSM780 (Zeiss) was  
602 used. Imaging was controlled by the ZEN 2.3 SP1 FP3 (Black) (Zeiss) software. GFP was  
603 excited with a 488 nm laser and detected in the range of 491-553 nm. mCherry and mRFP  
604 were excited with a 561 nm laser and detected in the range of 562-626 nm. Fluorophore  
605 crosstalk was minimized by splitting of the excitation tracks and reduction of emission  
606 spectrum overlap. Images were acquired with the C-Apochromat 40x/1.20 W Korr M27  
607 (Zeiss) objective, zoom factor of 8, pinhole set to 1,00 AU, pixel dwell time of 1.27  $\mu$ s and  
608 frame size of 1.024x1.024. Z-stacks for quantification were taken with the same settings,  
609 except with pixel dwell time of 0.79  $\mu$ s and frame size of 512x512. Pictures were  
610 processed with the manufacturer's software ZEN lite (Zeiss).



## 611 **Standardized FIT NB analysis procedure**

612 Following *Nicotiana benthamiana* leaf infiltration with *Rhizobium radiobacter*, FIT-  
613 GFP protein expression was induced after 2-3 d by  $\beta$ -estradiol, as described above. 16 h  
614 later, a leaf disc was excised and FIT-GFP fluorescence signals were recorded (t=0). The  
615 leaf disc was excited with 488 nm laser light for 1 min. 5 min later, FIT-GFP accumulation  
616 in FIT NBs was observed (t= 5 min). See **Supplemental Figure S1**. This procedure was  
617 modified by using different time points for NB analysis and different constructs  
618 (**Supplemental Table S1**) and co-expression as indicated in the text. Imaging was  
619 performed at the respective wavelengths for detection of GFP and mRFP/mCherry.

## 620 **FRAP measurements**

621 FRAP measurements (Bancaud et al., 2010; Trofimov et al., 2019) were performed  
622 at the confocal laser scanning microscope LSM780 (Zeiss). Imaging was controlled by the  
623 ZEN 2.3 SP1 FP3 (Black) (Zeiss) software. GFP was excited with a 488 nm laser and  
624 detected in the range of 491-553 nm. Images were acquired with the C-Apochromat  
625 40x/1.20 W Korr M27 (Zeiss) objective, zoom factor of 8, pinhole set to 2,43 AU, pixel  
626 dwell time of 1.0  $\mu$ s, frame size of 256x256, and 300 frames. After 20 frames, a NB was  
627 bleached with 50 iterations and 100% 488 nm laser power. Fluorescence intensity was  
628 recorded for the bleached NB (ROI), a non-bleached region equal in size to the NB (BG)  
629 as well as for the total image (Tot). Values were calculated and processed in Excel  
630 (Microsoft Corporation). Background subtraction and normalization to calculate the  
631 relative fluorescence intensity was performed as follows:  $[(ROI(t)-BG(t)/Tot(T)-$   
632  $BG(t))*(Tot(t_0)-BG(t_0)/ROI(t_0)-BG(t_0))]$ . The mobile fraction was calculated as follows:  
633  $[(F_{end}-F_{post})/(F_{pre}-F_{post})*100]$ .  $F_{pre}$  marks the average of the 20 values before bleaching,  
634  $F_{post}$  marks the value right after the bleaching, and  $F_{end}$  marks the average of the 280  
635 values after the bleaching. Pictures were processed with the manufacturer's software ZEN  
636 lite (Zeiss).

## 637 **Anisotropy (homo-FRET) measurements**

638 Anisotropy measurements (Stahl et al., 2013; Weidtkamp-Peters et al., 2022) were  
639 performed at the confocal laser scanning microscope LSM780 (Zeiss) equipped with a  
640 polarization beam splitter, bandpass filter (520/35), and a single-photon counting device  
641 HydraHarp (PicoQuant) with avalanche photo diodes ( $\tau$ -SPADs). Emission was detected  
642 in parallel and perpendicular orientation. Rhodamine 110 was used to determine the G

643 factor to correct for the differential parallel and perpendicular detector sensitivity.  
644 Calibration of the system was performed for every experiment and measurements were  
645 conducted in darkness. Free GFP and GFP-GFP were used as references for mono- and  
646 dimerization, respectively. GFP was excited with a linearly polarized pulsed (32 MHz)  
647 485 nm laser and 0.05-1  $\mu$ W output power. Measurements were recorded with a C-  
648 Apochromat 40x/1.20 W Korr M27 (Zeiss) objective, zoom factor of 8, pixel dwell time of  
649 12.5  $\mu$ s, objective frame size of 256x256, and 40 frames. Measurements were controlled  
650 with the manufacturer's ZEN 2.3 SP1 FP3 (Black) (Zeiss) software and SymPhoTime 64  
651 (PicoQuant) software. SymPhoTime 64 (PicoQuant) software was used for analysis in the  
652 respective regions of interest (whole nucleus, NB, NP) and to generate color-coded FA  
653 value images. Minimal photon count was set to 200.

#### 654 **FRET-FLIM measurements**

655 FRET-FLIM measurements (Borst and Visser, 2010; Weidtkamp-Peters and Stahl,  
656 2017) were taken at the confocal laser scanning microscope FV3000 (Olympus) equipped  
657 with a multi-photon counting device MultiHarp 150 (PicoQuant) with avalanche photo  
658 diodes ( $\tau$ -SPADs) and bandpass filter (520/35). Erythrosine B (quenched in saturated  
659 potassium iodide) was used to record the Instrument Response Function to correct for the  
660 time between laser pulse and detection. Calibration of the system was performed for every  
661 experiment and measurements were conducted in darkness. FIT-GFP and  
662 FITmSS271AA-GFP were used as negative controls (donor only), FIT-GFP or  
663 FITmSS271AA-GFP (donor) and bHLH039-mCherry (acceptor) as FRET pair. GFP was  
664 excited with a linearly polarized pulsed (32 MHz) 485 nm laser and 0.01-0.1  $\mu$ W output  
665 power. Measurements were recorded with a UPLSAPO 60XW (Olympus) objective, zoom  
666 factor of 8, pixel dwell time of 12.5  $\mu$ s, objective frame size of 256x256, and 60 frames.  
667 Measurements were controlled with the manufacturer's FV31S-SW (Olympus) software  
668 and SymPhoTime 64 (PicoQuant) software. SymPhoTime 64 (PicoQuant) software was  
669 used for analysis in the respective regions of interest (whole nucleus, NB, NP) and to  
670 generate color-coded fluorescence lifetime value images. Number of parameters for the  
671 fit depended on the region of interest.

#### 672 **Circularity quantification**

673 Circularity quantification was performed with the software ImageJ (National  
674 Institutes of Health). Full intensity projection images were generated from Z-stacks in the

675 ZEN lite (Zeiss) software and exported as TIFF (no compression, all dimensions). Images  
676 were duplicated in ImageJ and converted to RGB and 8-bit. Correct scale was set (in  $\mu\text{m}$ )  
677 under 'Analyze' - 'Set Scale'. Threshold for the intensity limit (areas below that limit were  
678 not considered for quantification) was set under 'Image' - 'Adjust' - 'Threshold' and was  
679 set manually for every image. To separate the nuclear bodies better, 'Process' - 'Binary' -  
680 'Watershed' was used. Parameters that should be quantified were selected under  
681 'Analyze' - 'Set Measurements'. To perform the analysis, 'Analyze' - 'Analyze Particles'  
682 was selected. Calculated values were further processed in Excel (Microsoft Corporation).

### 683 **Nuclear body quantification**

684 Nuclear body quantification was performed with the software ImageJ (National  
685 Institutes of Health) and additional plugin '3D Object Counter'. Z-stacks were exported  
686 from the ZEN lite (Zeiss) software as TIFF (no compression, all dimensions) first. In  
687 ImageJ, Z-stacks were converted to RGB and 8-bit. Correct scale was set (in  $\mu\text{m}$ ) under  
688 'Properties'. Parameters that should be quantified were selected under 'Plugins' - '3D  
689 Object Counter' - 'Set 3D Measurements'. To perform the analysis, 'Plugins' - '3D Object  
690 Counter' - '3D object counter' was selected. Threshold for the intensity limit (areas below  
691 that limit were not considered for quantification) was set manually for every z-stack.  
692 Calculated values were further processed in Excel (Microsoft Corporation). Only size  
693 between 0,01-15  $\mu\text{m}^3$  was considered.

### 694 **Protein domain prediction**

695 IDRs in FIT/FITmSS271AA were predicted with the tool PONDR-VLXT  
696 ([www.pondr.com](http://www.pondr.com), Molecular Kinetics, Inc.). According to the sequence of the protein, a  
697 PONDR score was determined for each amino acid. A score above 0.5 indicates intrinsic  
698 disorder. The bHLH domain of FIT was predicted with InterPro ([www.ebi.ac.uk/interpro](http://www.ebi.ac.uk/interpro),  
699 EMBL-EBI).

### 700 **Statistical analysis**

701 Line and bar diagrams represent the mean and standard deviation. Box plots show  
702 25-75 percentile with min-max whiskers, mean as small square and median as line.  
703 Graphs and statistical analysis were created and performed with OriginPro (OriginLab  
704 Corporation). Data was tested for normal distribution with the Shapiro-Wilk test. Statistical  
705 significance of data with normal distribution was tested by one-way Anova with Tukey



706 post-hoc test. Statistical significance of data with non-normal distribution was tested by  
707 Mann-Whitney test. Different letters indicate statistically significant differences ( $P < 0.05$ ).  
708 Illustrations were created with BioRender.com.

#### 709 **Accession numbers**

710       Sequence data from this article can be found in the EMBL/GenBank data libraries  
711 under accession numbers: *bHLH039* (AT3G56980), *COILIN* (AT1G13030), *FIT*  
712 (AT2G28160), *P15H1* (AT1G11570), *PIF3* (AT1G09530), *PIF4* (AT2G43010), *PININ*  
713 (AT1G15200), *SR45* (AT1G16610), *SRm102* (AT2G29210), *U2B"* (AT2G30260),  
714 *UAP56H2* (AT5G11170), and *ZAT12* (AT5G59820).

715 **Figures**

716 **Figure 1.** FIT accumulated in nuclear condensates, termed FIT nuclear bodies (NBs) in a  
717 light-inducible manner, most likely following liquid-liquid phase separation (LLPS).

718 **Figure 2.** The FIT C-terminal Ser271/272 site was important for the capacity of FIT to  
719 localize to NBs.

720 **Figure 3.** FIT was present in homodimeric protein complexes in NBs, dependent on  
721 Ser271/272 site.

722 **Figure 4.** FIT was present in heterodimeric protein complexes with bHLH039 in NBs,  
723 dependent on Ser271/272 site.

724 **Figure 5.** Two NB markers and splicing components were present in NBs in which FIT  
725 accumulated after the light trigger, whereas they were not part of FIT NBs (designated  
726 type II).

727 **Figure 6.** Three NB markers and speckle components became localized in FIT NBs and  
728 colocalized fully with FIT (designated type III), suggesting that FIT NBs have speckle  
729 function.

730 **Figure 7.** FIT colocalized with photobody (PB) markers in distinct PBs.

731 **Figure 8.** Schematic summary models illustrating the dynamics of FIT NB formation,  
732 suggesting that FIT NBs are related to transcriptional and posttranscriptional regulation in  
733 speckles.

734 **Supplemental Data**

735 **Supplemental Figure S1.** A standardized FIT NB analysis procedure was developed to  
736 analyze the characteristics and dynamics of FIT NBs. (Supports Figure 1)

737 **Supplemental Figure S2.** An intrinsically disordered region, IDR<sup>Ser271/272</sup>, is present in the  
738 FIT C-terminus and disrupted in the FITmSS271AA mutant. (Supports Figure 2, 3, and 4)

739 **Supplemental Figure S3.** FIT NBs did not colocalize with Cajal body components  
740 (designated type I). (Supports Figure 5 and 6)

741 **Supplemental Figure S4.** Type II and III NB markers are similarly localized upon single  
742 expression as upon co-expression with FIT, except PININ. (Supports Figure 5 and 6)

743 **Supplemental Figure S5.** PB markers are similarly localized upon single expression and  
744 upon co-expression with FIT. (Supports Figure 7)

745 **Supplemental Table S1.** List of vectors used in this study.

746 **Supplemental Movie S1.** Light induction triggers the formation of NBs with FIT and  
747 FITmSS271AA with different dynamics. (Supports Figure 1 and 2)

## 748 **Acknowledgements**

749 We thank Elke Wieneke and Monique Eutebach (Institute of Botany, Heinrich-  
750 Heine-University, Düsseldorf, Germany) for excellent technical assistance. We thank  
751 Rebecca C. Burkart (Institute of Developmental Genetics, Heinrich-Heine-University,  
752 Düsseldorf, Germany), Sebastian Hänsch and Stefanie Weidtkamp-Peters (Center for  
753 Advanced Imaging, Heinrich-Heine-University, Düsseldorf, Germany) for help and advice  
754 with microscopy and data analysis. K.T. is an associate member of the DFG-funded  
755 International Graduate School for Plant Science iGRAD*plant* (IRTG 2466 "Network,  
756 exchange, and training program to understand plant resource allocation"), Düsseldorf,  
757 Germany.

## 758 **Funding**

759 This work was funded by Deutsche Forschungsgemeinschaft (DFG, German  
760 Research Foundation) under GRK F020512056 (NEXT*plant*), SFB 1208 project B05, and  
761 Germany's Excellence Strategy – EXC-2048/1 – project ID 390686111. Funding for  
762 instrumentation: Zeiss ELYRA PS: DFG- INST 208/613-1 FUGG; Zeiss LSM780 + 4-  
763 channel FLIM extension (Picoquant): DFG- INST 208/551-1 FUGG; Olympus FV3000  
764 Confocal Laser Scanning Microscope with 4-channel FLIM extension (PicoQuant  
765 rapidFLIM): DFG- INST 1358/44-1 FUGB.

766 K.T., R.I., Y.S., P.B. and T.B. designed the research; K.T. performed research;  
767 K.T., R.I., Y.S., and T.B. analyzed data; R.G. contributed key materials; K.T. wrote the  
768 paper; P.B. acquired funding; all authors reviewed and edited the article.

769 **References**

- 770 **Ali, G.S., Golovkin, M., and Reddy, A.S.N.** (2003). Nuclear localization and in vivo  
771 dynamics of a plant-specific serine/arginine-rich protein. *Plant J.* **36**: 883–893.
- 772 **Bancaud, A., Huet, S., Rabut, G., and Ellenberg, J.** (2010). Fluorescence Perturbation  
773 Techniques to Study Mobility and Molecular Dynamics of Proteins in Live Cells:  
774 FRAP, Photoactivation, Photoconversion, and FLIP. *Cold Spring Harb. Protoc.*:  
775 1303–1325.
- 776 **Bauer, D., Viczian, A., Kircher, S., Nobis, T., Nitschke, R., Kunkel, T., Panigrahi,  
777 K.C.S., Ádám, É., Fejes, E., Schäfer, E., and Nagy, F.** (2004). Constitutive  
778 Photomorphogenesis 1 and Multiple Photoreceptors Control Degradation of  
779 Phytochrome Interacting Factor 3, a Transcription Factor Required for Light  
780 Signaling in Arabidopsis. *Plant Cell* **16**: 1433–1445.
- 781 **Bauer, P., Ling, H.Q., and Guerinot, M. Lou** (2007). FIT, the FER-LIKE IRON  
782 DEFICIENCY INDUCED TRANSCRIPTION FACTOR in Arabidopsis. *Plant Physiol.*  
783 *Biochem.* **45**: 260–261.
- 784 **Bi, Y. et al.** (2021). Arabidopsis ACINUS is O-glycosylated and regulates transcription  
785 and alternative splicing of regulators of reproductive transitions. *Nat. Commun.* **12**:  
786 1–13.
- 787 **Bleckmann, A., Weidtkamp-Peters, S., Seidel, C.A.M., and Simon, R.** (2010). Stem  
788 Cell Signaling in Arabidopsis Requires CRN to Localize CLV2 to the Plasma  
789 Membrane. *Plant Physiol.* **152**: 166–176.
- 790 **Boija, A. et al.** (2018). Transcription Factors Activate Genes through the Phase-  
791 Separation Capacity of Their Activation Domains. *Cell* **175**: 1842–1855.
- 792 **Borst, J.W. and Visser, A.J.W.G.** (2010). Fluorescence lifetime imaging microscopy in  
793 life sciences. *Meas. Sci. Technol.* **21**: 1–21.
- 794 **Bracha, D., Walls, M.T., Wei, M.T., Zhu, L., Kurian, M., Avalos, J.L., Toettcher, J.E.,  
795 and Brangwynne, C.P.** (2018). Mapping Local and Global Liquid Phase Behavior  
796 in Living Cells Using Photo-Oligomerizable Seeds. *Cell* **175**: 1467–1480.
- 797 **Brumbarova, T. and Ivanov, R.** (2019). The Nutrient Response Transcriptional  
798 Regulome of Arabidopsis. *iScience* **19**: 358–368.
- 799 **Burkart, R.C., Strotmann, V.I., Kirschner, G.K., Akinci, A., Czempik, L., Dolata, A.,  
800 Maizel, A., Weidtkamp-Peters, S., and Stahl, Y.** (2022). PLETHORA-WOX5  
801 interaction and subnuclear localization control Arabidopsis root stem cell

- 802 maintenance. *EMBO Rep.* **23**: 1–18.
- 803 **Van Buskirk, E.K., Reddy, A.K., Nagatani, A., and Chen, M.** (2014). Photobody  
804 Localization of Phytochrome B Is Tightly Correlated with Prolonged and Light-  
805 Dependent Inhibition of Hypocotyl Elongation in the Dark. *Plant Physiol.* **165**: 595–  
806 607.
- 807 **Colangelo, E.P. and Guerinot, M. Lou** (2004). The Essential Basic Helix-Loop-Helix  
808 Protein FIT1 Is Required for the Iron Deficiency Response. *Plant Cell* **16**: 3400–  
809 3412.
- 810 **Collier, S., Pendle, A., Boudonck, K., van Rij, T., Dolan, L., and Shaw, P.** (2006). A  
811 Distant Coilin Homologue Is Required for the Formation of Cajal Bodies in  
812 Arabidopsis. *Mol. Biol. Cell* **17**: 2942–2951.
- 813 **Cui, Y., Chen, C.L., Cui, M., Zhou, W.J., Wu, H.L., and Ling, H.Q.** (2018). Four IVa  
814 bHLH Transcription Factors Are Novel Interactors of FIT and Mediate JA Inhibition  
815 of Iron Uptake in Arabidopsis. *Mol. Plant* **11**: 1166–1183.
- 816 **Emenecker, R.J., Holehouse, A.S., and Strader, L.C.** (2020). Emerging Roles for  
817 Phase Separation in Plants. *Dev. Cell* **55**: 69–83.
- 818 **Emenecker, R.J., Holehouse, A.S., and Strader, L.C.** (2021). Sequence determinants  
819 of in cell condensate morphology, dynamics, and oligomerization as measured by  
820 number and brightness analysis. *Cell Commun. Signal.* **19**: 1–15.
- 821 **Fanara, S., Schloesser, M., Hanikenne, M., and Motte, P.** (2022). Altered metal  
822 distribution in the sr45-1 Arabidopsis mutant causes developmental defects. *Plant J.*  
823 **110**: 1332–1352.
- 824 **Fang, X., Wang, L., Ishikawa, R., Li, Y., Fiedler, M., Liu, F., Calder, G., Rowan, B.,**  
825 **Weigel, D., Li, P., and Dean, C.** (2019). Arabidopsis FLL2 promotes liquid–liquid  
826 phase separation of polyadenylation complexes. *Nature* **569**: 265–269.
- 827 **Galganski, L., Urbanek, M.O., and Krzyzosiak, W.J.** (2017). Nuclear speckles:  
828 Molecular organization, biological function and role in disease. *Nucleic Acids Res.*  
829 **45**: 10350–10368.
- 830 **Gao, F., Robe, K., Bettembourg, M., Navarro, N., Rofidal, V., Santoni, V., Gaymard,**  
831 **F., Vignols, F., Roschttardt, H., Izquierdo, E., and Dubos, C.** (2020). The  
832 Transcription Factor bHLH121 Interacts with bHLH105 (ILR3) and Its Closest  
833 Homologs to Regulate Iron Homeostasis in Arabidopsis. *Plant Cell* **32**: 508–524.
- 834 **Gao, Y.Q., Bu, L.H., Han, M.L., Wang, Y.L., Li, Z.Y., Liu, H.T., and Chao, D.Y.** (2021).

- 835 Long-distance blue light signalling regulates phosphate deficiency-induced primary  
836 root growth inhibition. *Mol. Plant* **14**: 1539–1553.
- 837 **Gratz, R. et al.** (2019). CIPK11-Dependent Phosphorylation Modulates FIT Activity to  
838 Promote Arabidopsis Iron Acquisition in Response to Calcium Signaling. *Dev. Cell*  
839 **48**: 726–740.
- 840 **Gratz, R., Brumbarova, T., Ivanov, R., Trofimov, K., Tünnermann, L., Ochoa-**  
841 **Fernandez, R., Blomeier, T., Meiser, J., Weidtkamp-Peters, S., Zurbriggen, M.,**  
842 **and Bauer, P.** (2020). Phospho-mutant activity assays provide evidence for  
843 alternative phospho-regulation pathways of the transcription factor FER-LIKE IRON  
844 DEFICIENCY-INDUCED TRANSCRIPTION FACTOR. *New Phytol.* **225**: 250–267.
- 845 **Guo, Z., Xu, J., Wang, Y., Hu, C., Shi, K., Zhou, J., Xia, X., Zhou, Y., Foyer, C.H., and**  
846 **Yu, J.** (2021). The phyB-dependent induction of HY5 promotes iron uptake by  
847 systemically activating FER expression. *EMBO Rep.* **22**: 1–15.
- 848 **Huang, X., Xiao, N., Zou, Y., Xie, Y., Tang, L., Zhang, Y., Yu, Y., Li, Y., and Xu, C.**  
849 (2022). Heterotypic transcriptional condensates formed by prion-like paralogous  
850 proteins canalize flowering transition in tomato. *Genome Biol.* **23**: 1–21.
- 851 **Jakoby, M., Wang, H.Y., Reidt, W., Weisshaar, B., and Bauer, P.** (2004). FRU  
852 (BHLH029) is required for induction of iron mobilization genes in Arabidopsis  
853 thaliana. *FEBS Lett.* **577**: 528–534.
- 854 **Jung, J.-H. et al.** (2020). A prion-like domain in ELF3 functions as a thermosensor in  
855 Arabidopsis. *Nature* **585**: 256–260.
- 856 **Kaiserli, E., Páldi, K., O'Donnell, L., Batalov, O., Pedmale, U. V., Nusinow, D.A.,**  
857 **Kay, S.A., and Chory, J.** (2015). Integration of Light and Photoperiodic Signaling in  
858 Transcriptional Nuclear Foci. *Dev. Cell* **35**: 311–321.
- 859 **Kalinina, N.O., Makarova, S., Makhotenko, A., Love, A.J., and Taliansky, M.** (2018).  
860 The Multiple Functions of the Nucleolus in Plant Development, Disease and Stress  
861 Responses. *Front. Plant Sci.* **9**: 1–19.
- 862 **Kammel, C., Thomaier, M., Sørensen, B.B., Schubert, T., Längst, G., Grasser, M.,**  
863 **and Grasser, K.D.** (2013). Arabidopsis DEAD-Box RNA Helicase UAP56 Interacts  
864 with Both RNA and DNA as well as with mRNA Export Factors. *PLoS One* **8**: 1–12.
- 865 **Kanwar, P., Baby, D., and Bauer, P.** (2021). Interconnection of iron and osmotic stress  
866 signalling in plants: is FIT a regulatory hub to cross-connect abscisic acid  
867 responses? *Plant Biol.* **23**: 31–38.

- 868 **Kim, D.W., Jeon, S.J., Hwang, S.M., Hong, J.C., and Bahk, J.D.** (2016). The C3H-  
869 type zinc finger protein GDS1/C3H42 is a nuclear-speckle-localized protein that is  
870 essential for normal growth and development in Arabidopsis. *Plant Sci.* **250**: 141–  
871 153.
- 872 **Kim, S.A., Lacroix, I.S., Gerber, S.A., and Guerinot, M. Lou** (2019). The iron  
873 deficiency response in Arabidopsis thaliana requires the phosphorylated  
874 transcription factor URI. *Proc. Natl. Acad. Sci.* **116**: 24933–24942.
- 875 **Kircher, S., Gil, P., Kozma-Bognár, L., Fejes, E., Speth, V., Husselstein-Muller, T.,**  
876 **Bauer, D., Ádám, É., Schäfer, E., and Nagy, F.** (2002). Nucleocytoplasmic  
877 Partitioning of the Plant Photoreceptors Phytochrome A, B, C, D, and E Is  
878 Regulated Differentially by Light and Exhibits a Diurnal Rhythm. *Plant Cell* **14**:  
879 1541–1555.
- 880 **Lafontaine, D.L.J., Riback, J.A., Bascetin, R., and Brangwynne, C.P.** (2021). The  
881 nucleolus as a multiphase liquid condensate. *Nat. Rev. Mol. Cell Biol.* **22**: 165–182.
- 882 **Le, C.T.T., Brumbarova, T., Ivanov, R., Stoof, C., Weber, E., Mohrbacher, J., Fink-**  
883 **Straube, C., and Bauer, P.** (2016). ZINC FINGER OF ARABIDOPSIS  
884 THALIANA12 (ZAT12) Interacts with FER-LIKE IRON DEFICIENCY-INDUCED  
885 TRANSCRIPTION FACTOR (FIT) Linking Iron Deficiency and Oxidative Stress  
886 Responses. *Plant Physiol.* **170**: 540–557.
- 887 **Leivar, P. and Monte, E.** (2014). PIFs: Systems Integrators in Plant Development. *Plant*  
888 *Cell* **26**: 56–78.
- 889 **Leonelli, L., Erickson, E., Lyska, D., and Niyogi, K.K.** (2016). Transient expression in  
890 *Nicotiana benthamiana* for rapid functional analysis of genes involved in non-  
891 photochemical quenching and carotenoid biosynthesis. *Plant J.* **88**: 375–386.
- 892 **Li, W., Lin, W.-D., Ray, P., Lan, P., and Schmidt, W.** (2013). Genome-Wide Detection  
893 of Condition-Sensitive Alternative Splicing in Arabidopsis Roots. *Plant Physiol.* **162**:  
894 1750–1763.
- 895 **Li, X., Zhang, H., Ai, Q., Liang, G., and Yu, D.** (2016). Two bHLH Transcription  
896 Factors, bHLH34 and bHLH104, Regulate Iron Homeostasis in Arabidopsis  
897 thaliana. *Plant Physiol.* **170**: 2478–2493.
- 898 **Liang, G., Zhang, H., Li, X., Ai, Q., and Yu, D.** (2017). bHLH transcription factor  
899 bHLH115 regulates iron homeostasis in Arabidopsis thaliana. *J. Exp. Bot.* **68**:  
900 1743–1755.



- 901 **Lin, C.L., Leu, S., Lu, M.C., and Ouyang, P.** (2004). Over-expression of SR-cyclophilin,  
902 an interaction partner of nuclear pinin, releases SR family splicing factors from  
903 nuclear speckles. *Biochem. Biophys. Res. Commun.* **321**: 638–647.
- 904 **Lingam, S., Mohrbacher, J., Brumbarova, T., Potuschak, T., Fink-Straube, C.,**  
905 **Blondet, E., Genschik, P., and Bauer, P.** (2011). Interaction between the bHLH  
906 Transcription Factor FIT and ETHYLENE INSENSITIVE3/ETHYLENE  
907 INSENSITIVE3-LIKE1 Reveals Molecular Linkage between the Regulation of Iron  
908 Acquisition and Ethylene Signaling in Arabidopsis. *Plant Cell* **23**: 1815–1829.
- 909 **Lorković, Z.J., Hilscher, J., and Barta, A.** (2008). Co-localisation studies of  
910 Arabidopsis SR splicing factors reveal different types of speckles in plant cell nuclei.  
911 *Exp. Cell Res.* **314**: 3175–3186.
- 912 **Lorković, Z.J., Hilscher, J., and Barta, A.** (2004). Use of Fluorescent Protein Tags to  
913 Study Nuclear Organization of the Spliceosomal Machinery in Transiently  
914 Transformed Living Plant Cells. *Mol. Biol. Cell* **15**: 3233–3243.
- 915 **Love, A.J., Yu, C., Petukhova, N. V., Kalinina, N.O., Chen, J., and Talianky, M.E.**  
916 (2017). Cajal bodies and their role in plant stress and disease responses. *RNA Biol.*  
917 **14**: 779–790.
- 918 **Martin, K., Kopperud, K., Chakrabarty, R., Banerjee, R., Brooks, R., and Goodin,**  
919 **M.M.** (2009). Transient expression in *Nicotiana benthamiana* fluorescent marker  
920 lines provides enhanced definition of protein localization, movement and  
921 interactions in planta. *Plant J.* **59**: 150–162.
- 922 **Meiser, J., Lingam, S., and Bauer, P.** (2011). Posttranslational Regulation of the Iron  
923 Deficiency Basic Helix-Loop-Helix Transcription Factor FIT Is Affected by Iron and  
924 Nitric Oxide. *Plant Physiol.* **157**: 2154–2166.
- 925 **Meyer, H.M.** (2020). In search of function : nuclear bodies and their possible roles as  
926 plant environmental sensors. *Curr. Opin. Plant Biol.* **58**: 33–40.
- 927 **Mikulski, P., Wolff, P., Lu, T., Nielsen, M., Echevarria, E.F., Zhu, D., Questa, J.I.,**  
928 **Saalbach, G., Martins, C., and Dean, C.** (2022). VAL1 acts as an assembly  
929 platform co-ordinating co-transcriptional repression and chromatin regulation at  
930 Arabidopsis FLC. *Nat. Commun.* **13**: 1–12.
- 931 **Naranjo-Arcos, M.A., Maurer, F., Meiser, J., Pateyron, S., Fink-Straube, C., and**  
932 **Bauer, P.** (2017). Dissection of iron signaling and iron accumulation by  
933 overexpression of subgroup Ib bHLH039 protein. *Sci. Rep.* **7**: 1–12.



- 934 **Owen, I. and Shewmaker, F.** (2019). The Role of Post-Translational Modifications in  
935 the Phase Transitions of Intrinsically Disordered Proteins. *Int. J. Mol. Sci.* **20**: 1–14.
- 936 **Pardi, S.A. and Nusinow, D.A.** (2021). Out of the Dark and Into the Light: A New View  
937 of Phytochrome Photobodies. *Front. Plant Sci.* **12**: 1–15.
- 938 **Pendle, A.F., Cark, G.P., Boon, R., Lewandowska, D., Lam, Y.W., Andersen, J.,  
939 Mann, M., Lamond, A.I., Brown, J.W.S., and Shaw, P.J.** (2005). Proteomic  
940 Analysis of the Arabidopsis Nucleolus Suggests Novel Nucleolar Functions. *Mol.  
941 Biol. Cell* **16**: 260–269.
- 942 **Pham, V.N., Kathare, P.K., and Huq, E.** (2018). Phytochromes and Phytochrome  
943 Interacting Factors. *Plant Physiol.* **176**: 1025–1038.
- 944 **Powers, S.K. et al.** (2019). Nucleo-cytoplasmic Partitioning of ARF Proteins Controls  
945 Auxin Responses in *Arabidopsis thaliana*. *Mol. Cell* **76**: 177–190.
- 946 **Qiu, Y., Li, M., Kim, R.J.A., Moore, C.M., and Chen, M.** (2019). Daytime temperature is  
947 sensed by phytochrome B in *Arabidopsis* through a transcriptional activator  
948 HEMERA. *Nat. Commun.* **10**: 1–13.
- 949 **Qiu, Y., Pasoreck, E.K., Yoo, C.Y., He, J., Wang, H., Bajracharya, A., Li, M., Larsen,  
950 H.D., Cheung, S., and Chen, M.** (2021). RCB initiates *Arabidopsis*  
951 thermomorphogenesis by stabilizing the thermoregulator PIF4 in the daytime. *Nat.  
952 Commun.* **12**: 1–13.
- 953 **Reddy, A.S.N., Day, I.S., Gohring, J., and Barta, A.** (2012). Localization and Dynamics  
954 of Nuclear Speckles in Plants. *Plant Physiol.* **158**: 67–77.
- 955 **Riback, J.A., Zhu, L., Ferrolino, M.C., Tolbert, M., Mitrea, D.M., Sanders, D.W., Wei,  
956 M.-T., Kriwacki, R.W., and Brangwynne, C.P.** (2020). Composition-dependent  
957 thermodynamics of intracellular phase separation. *Nature* **581**: 209–214.
- 958 **Römheld, V. and Marschner, H.** (1986). Mobilization of iron in the rhizosphere of  
959 different plant species. *Adv. Plant Nutr.* **2**: 155–204.
- 960 **Salladini, E., Jørgensen, M.L.M., Theisen, F.F., and Skriver, K.** (2020). Intrinsic  
961 Disorder in Plant Transcription Factor Systems: Functional Implications. *Int. J. Mol.  
962 Sci.* **21**: 1–35.
- 963 **Schwarz, B. and Bauer, P.** (2020). FIT, a regulatory hub for iron deficiency and stress  
964 signaling in roots, and FIT-dependent and -independent gene signatures. *J. Exp.  
965 Bot.* **71**: 1694–1705.
- 966 **Shamloul, M., Trusa, J., Mett, V., and Yusibov, V.** (2014). Optimization and Utilization

- 967 of Agrobacterium-mediated Transient Protein Production in Nicotiana. *J. Vis. Exp.*:  
968 1–13.
- 969 **Shin, Y., Berry, J., Pannucci, N., Haataja, M.P., Toettcher, J.E., and Brangwynne,**  
970 **C.P.** (2017). Spatiotemporal Control of Intracellular Phase Transitions Using Light-  
971 Activated optoDroplets. *Cell* **168**: 159–171.
- 972 **Stahl, Y. et al.** (2013). Moderation of Arabidopsis root Stemness by CLAVATA1 and  
973 ARABIDOPSIS CRINKLY4 Receptor Kinase Complexes. *Curr. Biol.* **23**: 362–371.
- 974 **Strader, L., Weijers, D., and Wagner, D.** (2022). Plant transcription factors — being in  
975 the right place with the right company. *Curr. Opin. Plant Biol.* **65**: 102136.
- 976 **Tarczewska, A. and Greb-Markiewicz, B.** (2019). The Significance of the Intrinsically  
977 Disordered Regions for the Functions of the bHLH Transcription Factors. *Int. J. Mol.*  
978 *Sci.* **20**: 1–20.
- 979 **Trinkle-Mulcahy, L. and Sleeman, J.E.** (2017). The Cajal body and the nucleolus: “In a  
980 relationship” or “It’s complicated”? *RNA Biol.* **14**: 739–751.
- 981 **Trofimov, K., Ivanov, R., Eutebach, M., Acaroglu, B., Mohr, I., Bauer, P., and**  
982 **Brumbarova, T.** (2019). Mobility and localization of the iron deficiency-induced  
983 transcription factor bHLH039 change in the presence of FIT. *Plant Direct* **3**: 1–11.
- 984 **Wang, H.Y., Klatte, M., Jakoby, M., Bäumlein, H., Weisshaar, B., and Bauer, P.**  
985 (2007). Iron deficiency-mediated stress regulation of four subgroup Ib BHLH genes  
986 in Arabidopsis thaliana. *Planta* **226**: 897–908.
- 987 **Wang, N., Cui, Y., Liu, Y., Fan, H., Du, J., Huang, Z., Yuan, Y., Wu, H., and Ling,**  
988 **H.Q.** (2013). Requirement and Functional Redundancy of Ib Subgroup bHLH  
989 Proteins for Iron Deficiency Responses and Uptake in Arabidopsis thaliana. *Mol.*  
990 *Plant* **6**: 503–513.
- 991 **Wang, X., Jiang, B., Gu, L., Chen, Y., Mora, M., Zhu, M., Noory, E., Wang, Q., and**  
992 **Lin, C.** (2021). A photoregulatory mechanism of the circadian clock in Arabidopsis.  
993 *Nat. Plants* **7**: 1397–1408.
- 994 **Wedepohl, K.H.** (1995). The composition of the continental crust. *Geochim.*  
995 *Cosmochim. Acta* **59**: 1217–1232.
- 996 **Weidtkamp-Peters, S., Rehwald, S., and Stahl, Y.** (2022). Homo-FRET Imaging to  
997 Study Protein–Protein Interaction and Complex Formation in Plants. In *Plant*  
998 *Synthetic Biology: Methods and Protocols*, M.D. Zurbriggen, ed (Springer US: New  
999 York, NY), pp. 197–208.

- 1000 **Weidtkamp-Peters, S. and Stahl, Y.** (2017). The Use of FRET/FLIM to Study Proteins  
1001 Interacting with Plant Receptor Kinases. In *Plant Receptor Kinases: Methods and*  
1002 *Protocols*, R.B. Aalen, ed (Springer New York: New York, NY), pp. 163–175.
- 1003 **Wild, M., Davière, J.M., Regnault, T., Sakvarelidze-Achard, L., Carrera, E., Lopez**  
1004 **Diaz, I., Cayrel, A., Dubeaux, G., Vert, G., and Achard, P.** (2016). Tissue-Specific  
1005 Regulation of Gibberellin Signaling Fine-Tunes Arabidopsis Iron-Deficiency  
1006 Responses. *Dev. Cell* **37**: 190–200.
- 1007 **Yang, Y., Ou, B., Zhang, J., Si, W., Gu, H., Qin, G., and Qu, L.-J.** (2014). The  
1008 Arabidopsis Mediator subunit MED16 regulates iron homeostasis by associating  
1009 with EIN3/EIL1 through subunit MED25. *Plant J.* **77**: 838–851.
- 1010 **Yuan, Y., Wu, H., Wang, N., Li, J., Zhao, W., Du, J., Wang, D., and Ling, H.Q.** (2008).  
1011 FIT interacts with AtbHLH38 and AtbHLH39 in regulating iron uptake gene  
1012 expression for iron homeostasis in Arabidopsis. *Cell Res.* **18**: 385–397.
- 1013 **Yuan, Y.X., Zhang, J., Wang, D.W., and Ling, H.Q.** (2005). AtbHLH29 of Arabidopsis  
1014 thaliana is a functional ortholog of tomato FER involved in controlling iron  
1015 acquisition in strategy I plants. *Cell Res.* **15**: 613–621.
- 1016 **Zhang, J., Liu, B., Li, M., Feng, D., Jin, H., Wang, P., Liu, J., Xiong, F., Wang, J., and**  
1017 **Wang, H.** (2015). The bHLH Transcription Factor bHLH104 Interacts with IAA-  
1018 LEUCINE RESISTANT3 and Modulates Iron Homeostasis in Arabidopsis. *Plant Cell*  
1019 **27**: 787–805.
- 1020 **Zhang, Y., Wu, H., Wang, N., Fan, H., Chen, C., Cui, Y., Liu, H., and Ling, H.Q.**  
1021 (2014). Mediator subunit 16 functions in the regulation of iron uptake gene  
1022 expression in Arabidopsis. *New Phytol.* **203**: 770–783.
- 1023 **Zhu, P., Lister, C., and Dean, C.** (2021). Cold-induced Arabidopsis FRIGIDA nuclear  
1024 condensates for FLC repression. *Nature* **599**: 657–661.
- 1025

# 1 Trofimov et. al. Figures and figure legends

## 2 Figure 1

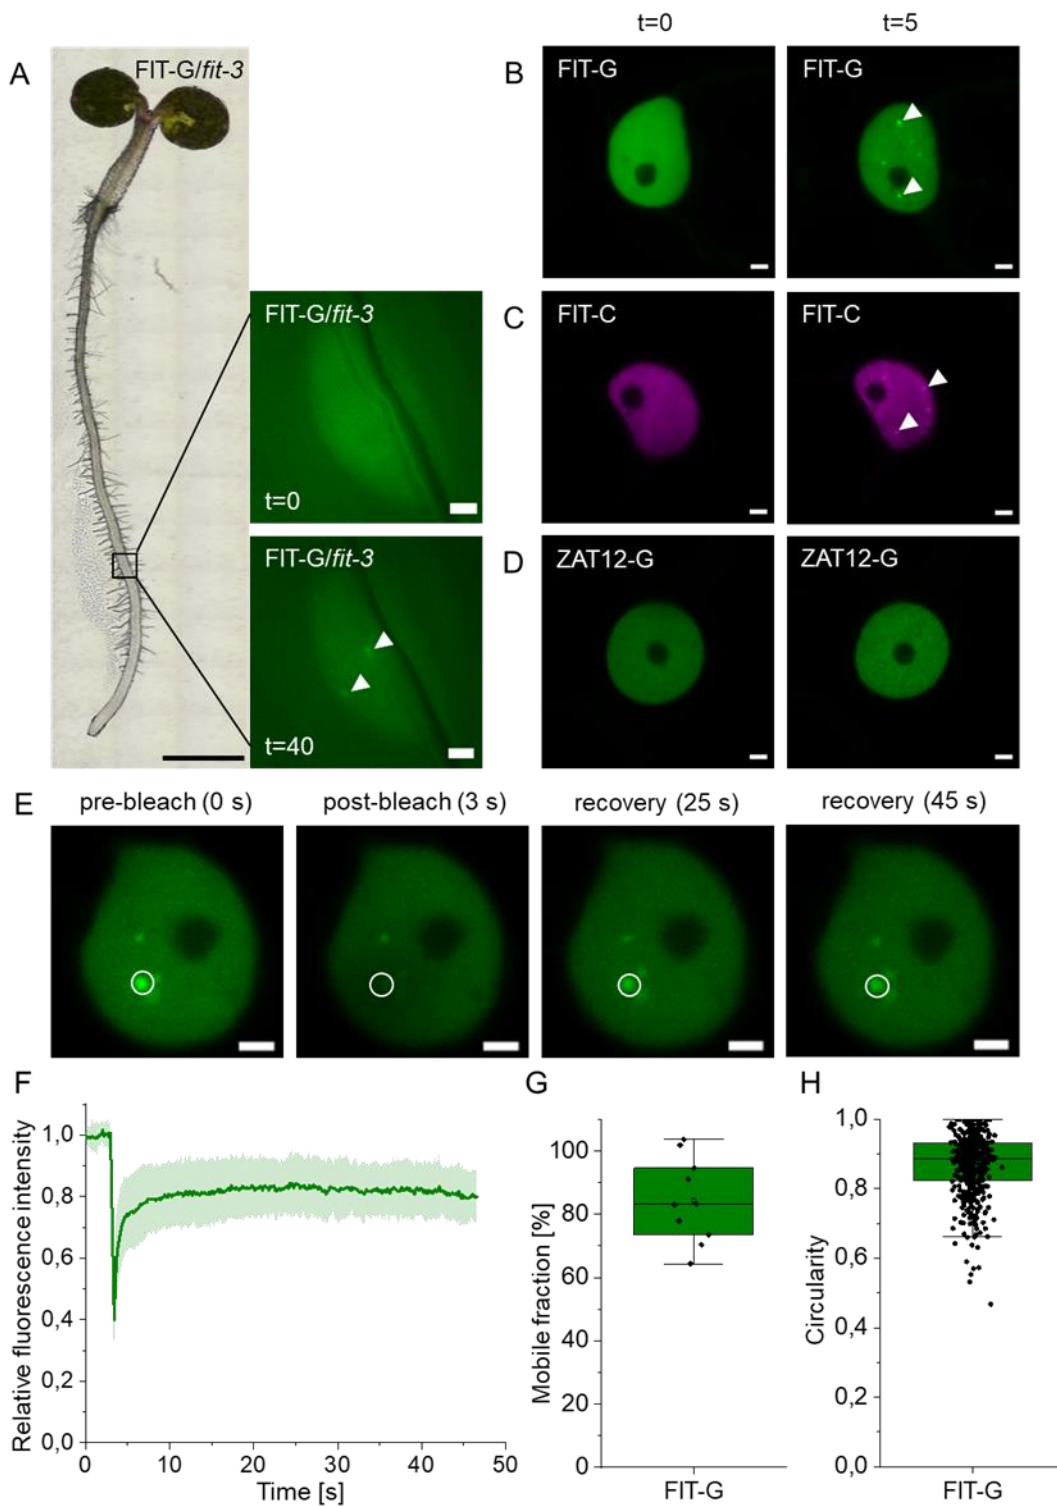

3

4 **Figure 1: FIT accumulated in nuclear condensates, termed FIT nuclear bodies (NBs)**  
5 **in a light-inducible manner, most likely following liquid-liquid phase separation**  
6 **(LLPS).**

7 A, Induction of FIT NBs in Arabidopsis root epidermis cells of the root differentiation  
8 zone. Left, light microscopy overview image of a 5-d-old Arabidopsis seedling (FIT-  
9 GFP/*fit-3*) grown in iron deficiency. Right, nuclear localization of FIT-GFP in the root  
10 epidermis cells as indicated in the overview image, at t=0 and t=40 min. FIT-GFP signals  
11 were evenly distributed in the nucleus at t=0 min, and after induction by excitation with  
12 488 nm laser NB formation accumulated in NBs at t=40 min. Note that root epidermis cells  
13 developed few NBs with weak FIT-GFP signals, sometimes taking up to two hours to  
14 appear. Four independent experiments with three plants were conducted. In the indicated  
15 region of interest, approximately a quarter of the root epidermis cells showed NBs. A  
16 representative image from one nucleus is shown. B-D, Fluorescence protein analysis in  
17 transiently transformed *N. benthamiana* leaf epidermis cells. Confocal images of B, FIT-  
18 GFP, C, FIT-mCherry, and D, ZAT12-GFP at t=0 and t=5 min. At t=0 min, FIT-GFP and  
19 FIT-mCherry showed an even distribution within the nucleus. Following a 488 nm laser  
20 excitation, numerous NBs were clearly visible in all examined transformed cells at t=5 min.  
21 These NBs were termed FIT NBs. Under the same imaging conditions, ZAT12-GFP did  
22 not show NB formation. According to these results, a standardized FIT NB analysis  
23 procedure was set up (**Supplemental Figure S1**). See also **Supplemental Movie S1A-**  
24 **C**. Representative images from two to three independent experiments. E-G, FRAP  
25 measurements to test for liquid-like behaviour of FIT NBs, using the standardized FIT NB  
26 analysis procedure in transiently transformed *N. benthamiana* leaf epidermis cells. E,  
27 Representative images of the fluorescent signal during a FRAP experiment, taken before  
28 bleaching (0 s) and recovery of fluorescence at three time points after bleaching from 3 s  
29 to 45 s within the circled region of a NB. F, Line diagram representing the relative  
30 fluorescence during a FRAP measurement for 10 NBs, showing a high fluorescence  
31 recovery rate of FIT-GFP within NBs. Dark green line, mean value; light green filled area,  
32 variation. G, Box plot diagram representing the mobile fraction of FIT-GFP calculated  
33 based on the relative fluorescence recovery in F. The diagram indicates high mobility of  
34 FIT. The mean was calculated from 10 NBs from 10 nuclei from a transformed plant. Three  
35 independent experiments were conducted, one representative result is shown. H, Box plot  
36 diagram representing quantification of the FIT NB shape with the software ImageJ

37 (National Institutes of Health), indicating that FIT NBs have circular shape. Mobility and  
38 circularity characteristics indicate that FIT NBs are most likely liquid condensates that are  
39 the result of LLPS. The mean was calculated from all NBs visible in 15 nuclei from a  
40 transformed plant. Two independent experiments were conducted, one representative  
41 result is shown.

42 Box plots show 25-75 percentile with min-max whiskers, mean as small square and  
43 median as line. Scale bars of nuclei images, 2  $\mu\text{m}$ ; scale bar full seedling, 1 mm.  
44 Arrowheads indicate NBs. G = GFP; C = mCherry.

45 **Figure 2**

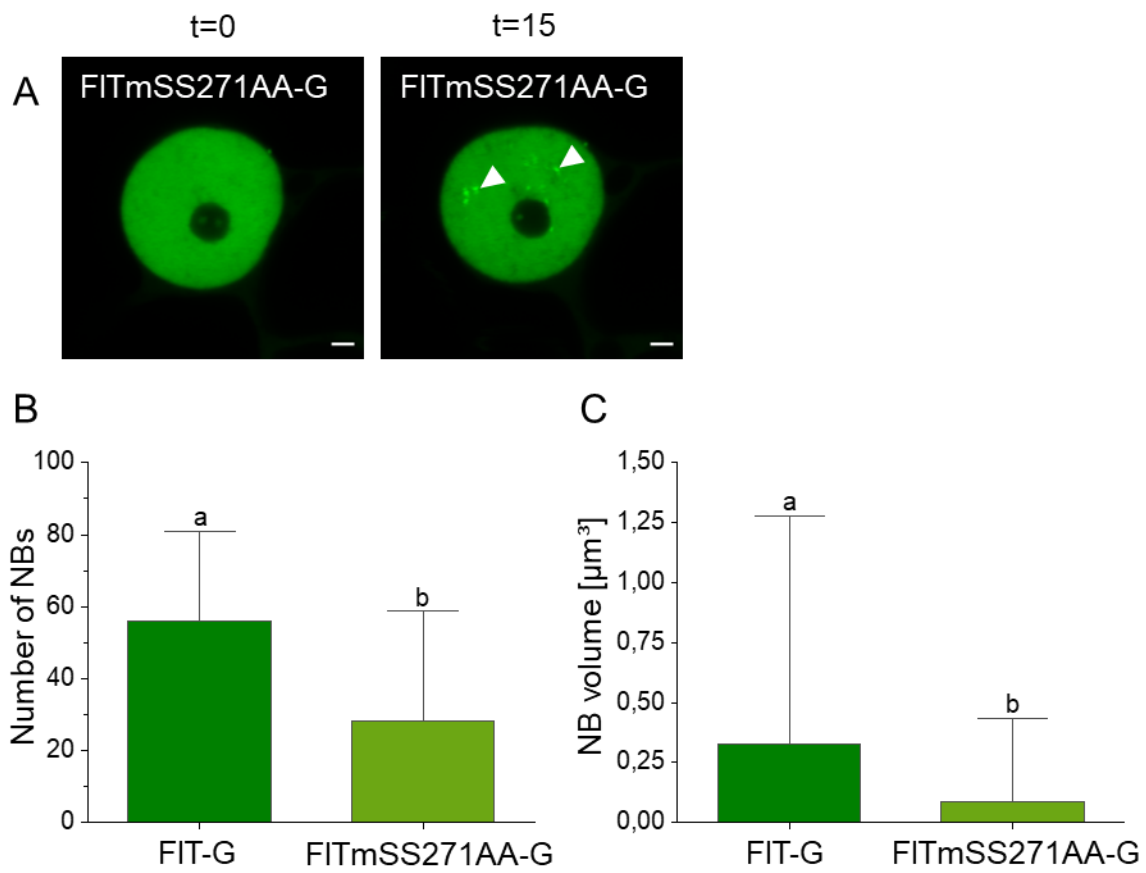

46

47 **Figure 2: The FIT C-terminal Ser271/272 site was important for the capacity of FIT**  
48 **to localize to NBs.**

49 A, Confocal images of nuclear localization of FITmSS271AA-GFP at t=0 and  
50 t=15 min. FITmSS271AA-GFP accumulated in NBs, but NB formation required a longer  
51 time compared to FIT-GFP. See also **Supplemental Movie S1, A and C**. Two  
52 independent experiments. Representative images from one nucleus. B, Bar diagrams  
53 showing in B, number of NBs, and in C, the sizes of NBs with FIT-GFP and  
54 FITmSS271AA-GFP at t=5/15 min. NB number and size were determined with the  
55 software ImageJ (National Institute of Health). FIT-GFP accumulated in more and larger  
56 NBs than FITmSS271AA-GFP. See **Supplemental Movie S1, A and C**. FITmSS271AA-  
57 GFP lacks IDR<sup>Ser271/272</sup>. This IDR may be relevant for FIT NB formation (**Supplemental**  
58 **Figure S2**). In B and C, bar diagrams represent the mean and standard deviation for a  
59 quantification of 15 nuclei from a transformed plant (n = 15). Two experiments were  
60 conducted, one representative result is shown.

61 Statistical analysis was performed with the Mann-Whitney test. Different letters  
62 indicate statistically significant differences ( $P < 0.05$ ). Scale bar: 2  $\mu$ m. Arrowheads  
63 indicate NBs. G = GFP. Analysis was conducted in transiently transformed  
64 *N. benthamiana* leaf epidermis cells, following the standardized FIT NB analysis  
65 procedure.



66 **Figure 3**

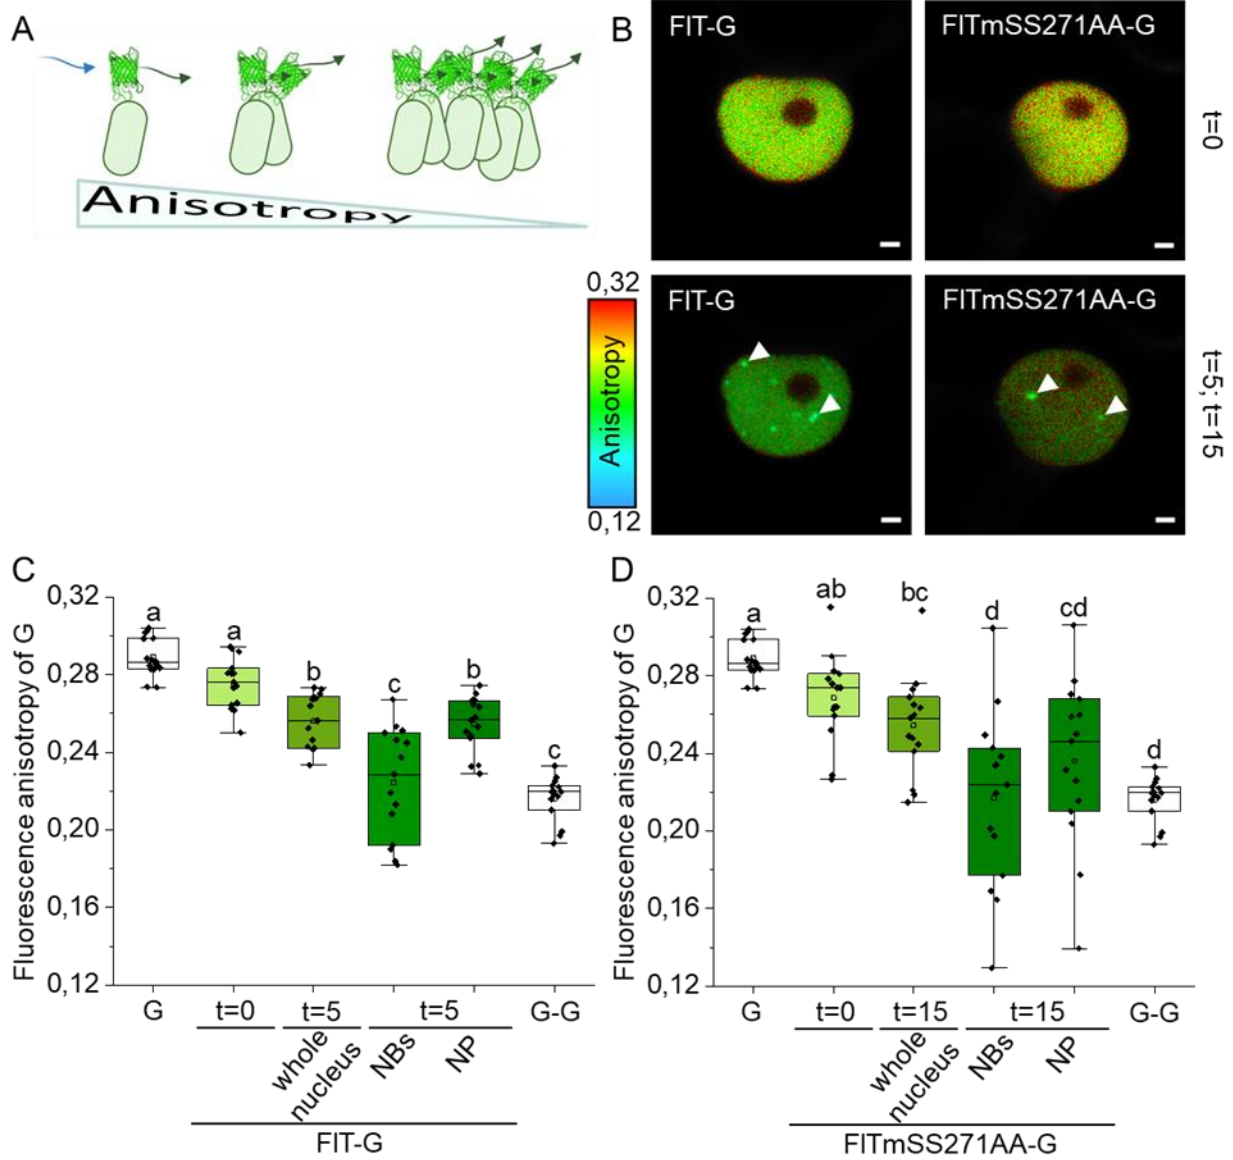

67

68 **Figure 3: FIT was present in homodimeric protein complexes in NBs, dependent on**  
69 **Ser271/272 site.**

70 Anisotropy (or homo-FRET) measurements of FIT-GFP and FITmSS271AA-GFP  
71 to determine homodimerization strength. A, Schematic illustration of the anisotropy  
72 principle. Energy transfer between the same kind of fluorescently tagged proteins leads  
73 to depolarization of the emitted light. Extent of the depolarization gives a hint on  
74 dimerization and oligomerization of a protein as the fluorescence anisotropy (FA) value  
75 decreases. B, Representative images showing colour-coded FA values of FIT-GFP and  
76 FITmSS271AA at t=0 and t=5/15 min. C-D, Box plots representing quantification of FA  
77 values. FA was measured at t=0 within the whole nucleus and at t =5/15 min within the  
78 whole nucleus, in NBs and in residual NP. Free GFP and GFP-GFP served as references  
79 for mono- and dimerization. FA values for C, FIT-GFP, and D, FITmSS271AA-GFP. In C  
80 and D, FA values were calculated from 10-15 nuclei from a transformed plant (n = 10-15).  
81 Two experiments were conducted, one representative result is shown. C and D show the  
82 same free GFP and GFP-GFP references because both measurements were performed  
83 on the same day. FA values decreased for FIT-GFP, but not FITmSS271AA-GFP, in the  
84 whole nucleus (compare t=0 with t=5/15 min). FA values were also lowered in NBs versus  
85 NP in the case of FIT-GFP but not FITmSS271AA-GFP (compare t=5/15 min of NBs and  
86 NP). This indicates stronger homodimerization of FIT than FITmSS271AA-GFP in the  
87 whole nucleus and in NBs. IDR<sup>Ser271/272</sup> may therefore be relevant for FIT NB formation  
88 and FIT homodimerization (**Supplemental Figure S2**).

89 Box plots show 25-75 percentile with min-max whiskers, mean as small square and  
90 median as line. Statistical analysis was performed with one-way ANOVA and Tukey post-  
91 hoc test. Different letters indicate statistically significant differences (P < 0.05). Scale bar:  
92 2 µm. Arrowheads indicate NBs. G = GFP. Fluorescence protein analysis was conducted  
93 in transiently transformed *N. benthamiana* leaf epidermis cells, following the standardized  
94 FIT NB analysis procedure.

95 **Figure 4**

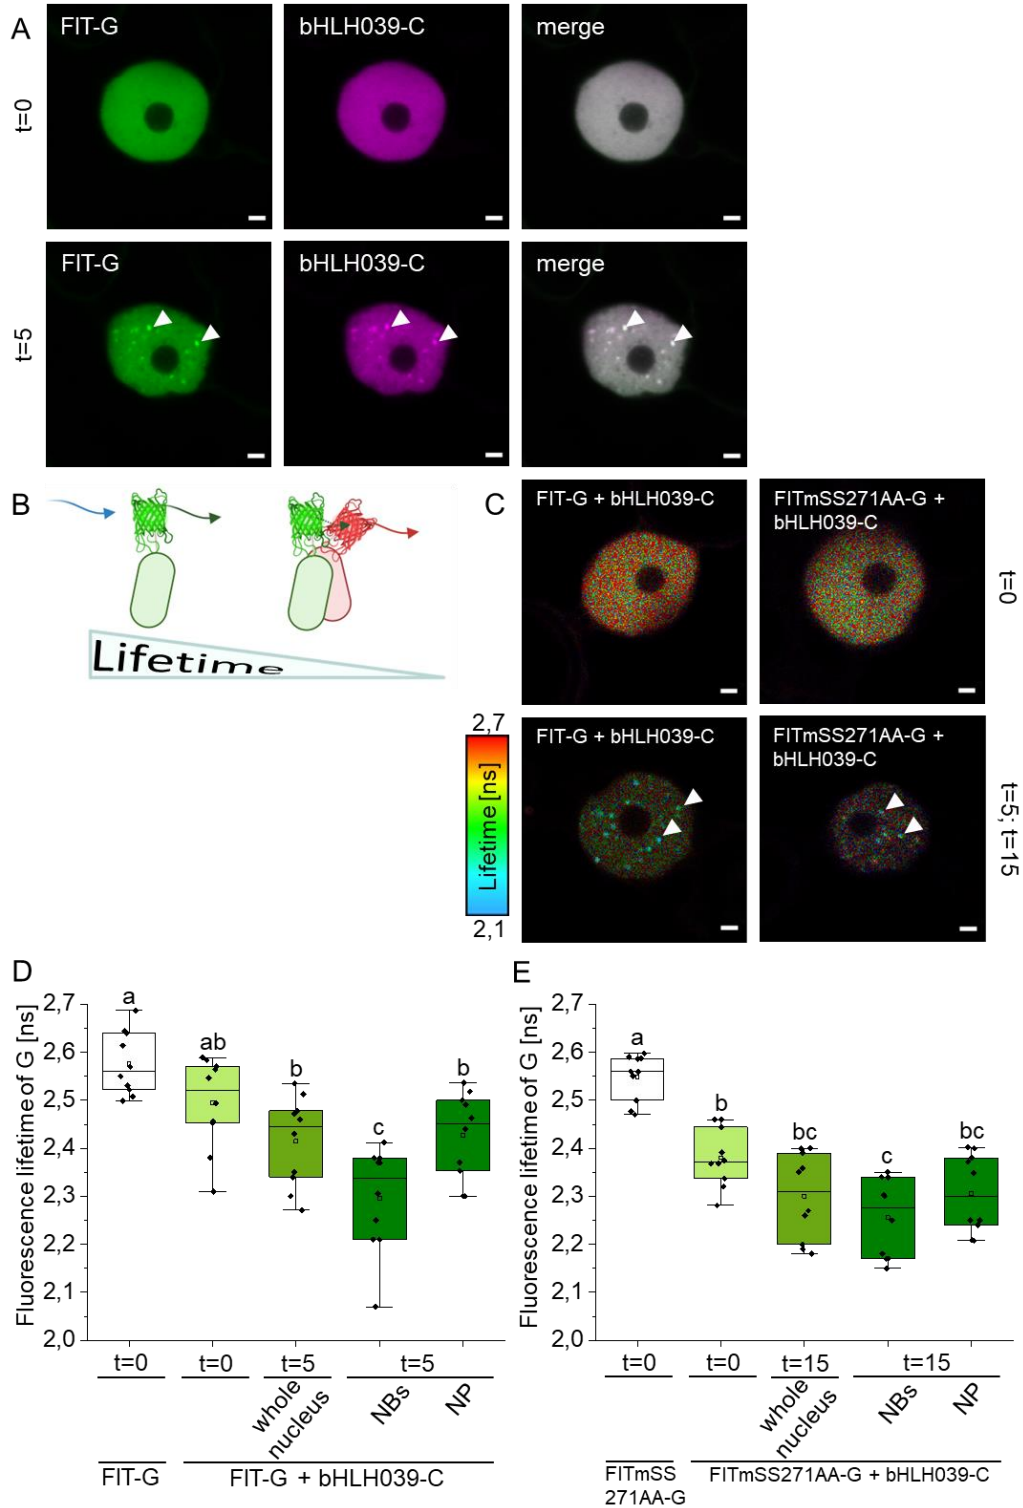

96

97 **Figure 4: FIT was present in heterodimeric protein complexes with bHLH039 in NBs,**  
98 **dependent on Ser271/272 site.**

99 A, Confocal images with colocalization of FIT-GFP and bHLH039-mCherry in the  
100 nucleus. Both proteins were evenly distributed within the nucleus at t=0 and colocalized  
101 fully in FIT NBs at t=5 min. Two independent experiments with two plants each.  
102 Representative images from one nucleus. B-E, FRET-FLIM measurements to determine  
103 heterodimerization strength of FIT and FITmSS271AA with bHLH039, respectively. FIT-  
104 GFP and FITmSS271AA-GFP (donor only) served as negative controls. B, Schematic  
105 illustration of the FRET-FLIM principle. Energy transfer occurs between two different  
106 fluorophores. One fluorophore acts as the donor and the other as the acceptor of the  
107 energy. In case of interaction (close proximity,  $\leq 10$  nm) the fluorescence lifetime of the  
108 donor decreases. C, Representative images showing colour-coded fluorescence lifetime  
109 values of FIT-GFP and FITmSS271AA-GFP co-expressed with bHLH039-mCherry at t=0  
110 and t=5/15 min. D-E, Box plots diagrams representing FRET-FLIM measurements at t=0  
111 within the whole nucleus and at t=5/15 min within the whole nucleus, inside NBs and in  
112 residual NP. Lifetime values represent measurements of 10 nuclei from a transformed  
113 plant (n = 10). Two experiments were conducted, one representative result is shown.  
114 Fluorescence lifetime was reduced for the pair of FIT-GFP and bHLH039-mCherry in NBs  
115 versus NP at t=5 min, indicating protein interaction preferentially inside NBs. Fluorescence  
116 lifetime values were not significantly different for the pair FITmSS271AA-GFP and  
117 bHLH039-mCherry in this same comparison at t=15 min, indicating that this pair did not  
118 preferentially interact in NBs. IDR<sup>Ser271/272</sup> may therefore be relevant for FIT NB formation,  
119 and FIT homo- and heterodimerization (**Supplemental Figure S2**).

120 Box plots show 25-75 percentile with min-max whiskers, mean as small square and  
121 median as line. Statistical analysis was performed with one-way ANOVA and Tukey post-  
122 hoc test. Different letters indicate statistically significant differences ( $P < 0.05$ ). Scale bar:  
123 2  $\mu$ m. Arrowheads indicate NBs. G = GFP; C = mCherry. Fluorescence protein analysis  
124 was conducted in transiently transformed *N. benthamiana* leaf epidermis cells, following  
125 the standardized FIT NB analysis procedure.

126 **Figure 5**

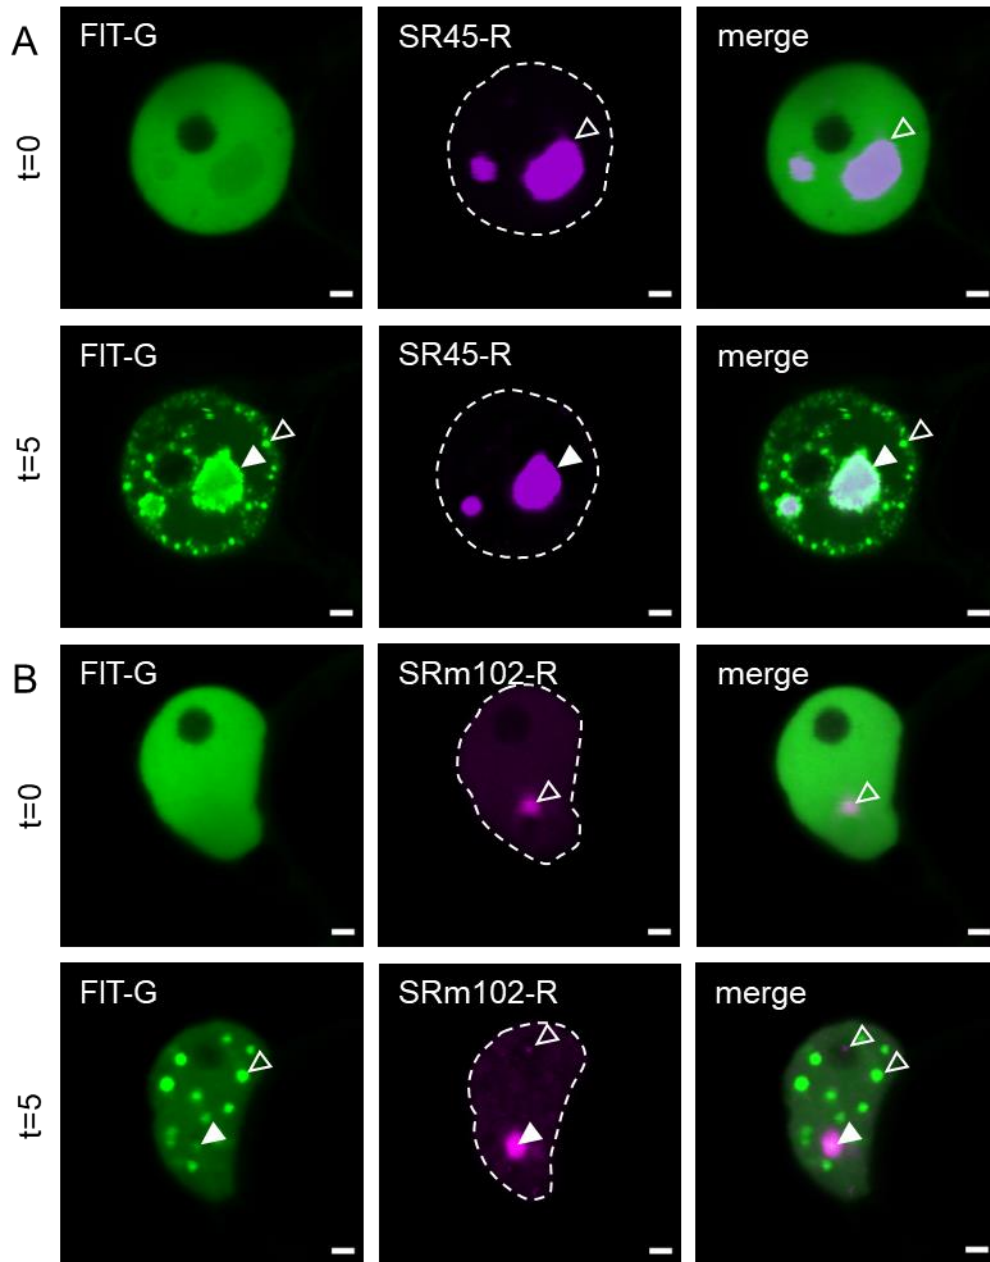

127

128 **Figure 5: Two NB markers and splicing components were present in NBs in which**  
129 **FIT accumulated after the light trigger, whereas they were not part of FIT NBs**  
130 **(designated type II).**

131 Confocal images showing localization of FIT-GFP and NB markers (type II) upon  
132 co-expression in the nucleus at t=0 and t=5 min. Co-expression of FIT-GFP with A, SR45-  
133 mRFP, and B, SRm102-mRFP. Type II NB markers localized inside NBs at t=0 and  
134 t=5 min. Similar localization patterns were observed upon single expression, showing that  
135 SR45 and SRm102 are present in distinct NB types (compare with **Supplemental**  
136 **Figure S4, A and B**). FIT-GFP colocalized with type II markers in their distinct NBs at  
137 t=5 min, but not t=0. FIT-GFP additionally localized in FIT NBs at t=5 min. Type II markers  
138 were not present in FIT NBs, while FIT-GFP became recruited into the distinct type II NBs  
139 upon the light trigger. Hence, FIT NBs could be associated with speckle components.

140 Scale bar: 2  $\mu$ m. Filled arrowheads indicate colocalization in NBs, empty  
141 arrowheads indicate no colocalization in NBs. G = GFP; R = mRFP. Fluorescence protein  
142 analysis was conducted in transiently transformed *N. benthamiana* leaf epidermis cells,  
143 following the standardized FIT NB analysis procedure. Representative images from two  
144 to five independent experiments are shown. For data with type I markers (no  
145 colocalization) and type III markers (full colocalization) see **Supplemental Figure S3** and  
146 **Figure 6**.

147 **Figure 6**

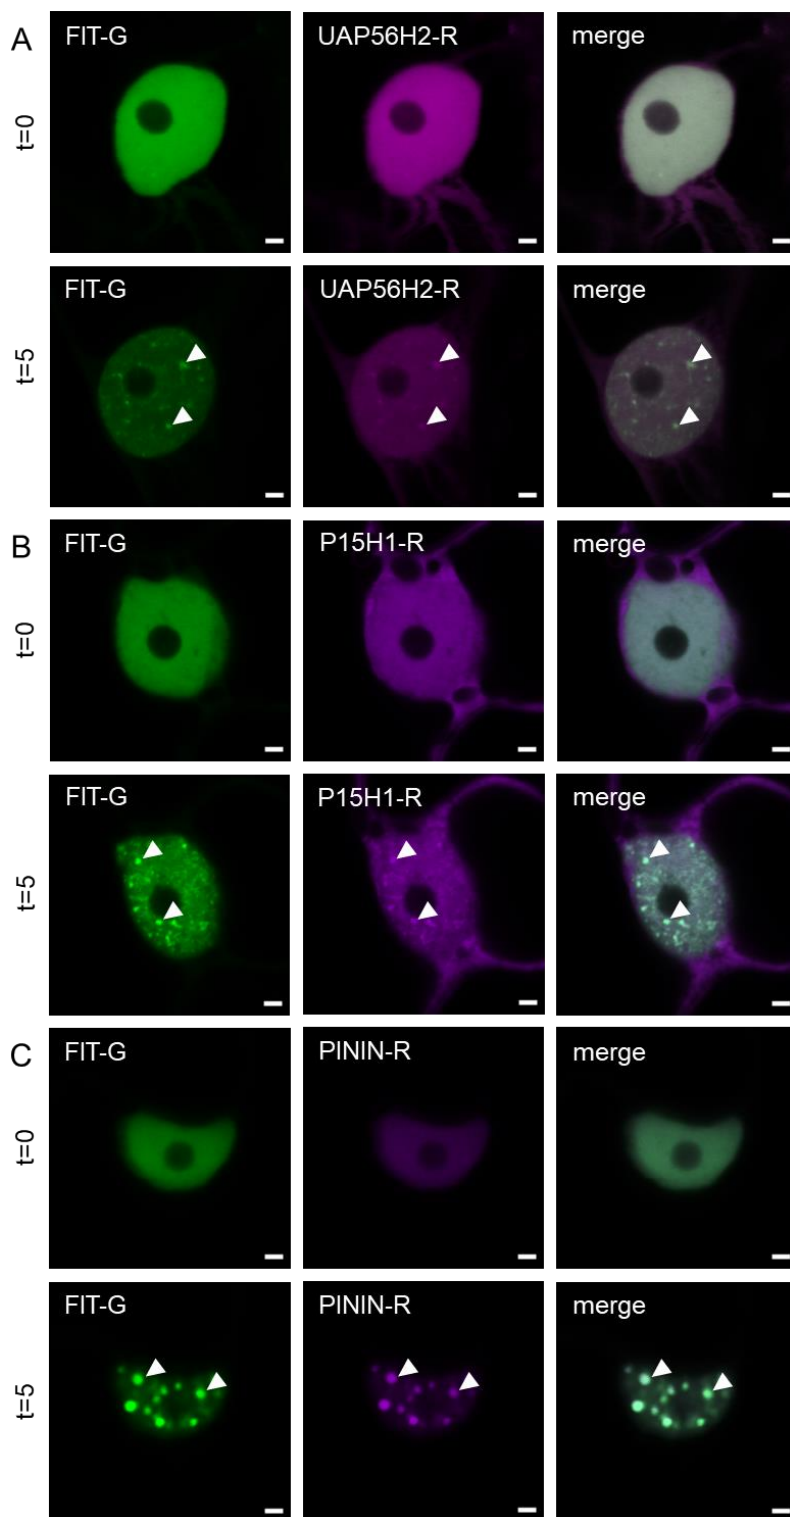

148



149 **Figure 6: Three NB markers and speckle components became localized in FIT NBs**  
150 **and colocalized fully with FIT (designated type III), suggesting that FIT NBs have**  
151 **speckle function.**

152 Confocal images showing localization of FIT-GFP and NB markers (type III) upon  
153 co-expression in the nucleus at t=0 and t=5 min. Co-expression of FIT-GFP with A,  
154 UAP56H2-mRFP, B, P15H1-mRFP, and C, PININ-mRFP. All three type III NB markers  
155 were homogeneously distributed and colocalized with FIT-GFP in the nucleus at t=0, while  
156 they colocalized with FIT-GFP in FIT NBs at t=5 min. UAP56H2-mRFP and P15H1-mRFP  
157 showed homogeneous localization in the single expression at both t=0 and t=5 min  
158 (compare with **Supplemental Figure S4, C and D**), while PININ-mRFP localized mainly  
159 in one large and several small NBs upon single expression at t=0 and t=5 min (compare  
160 with **Supplemental Figure S4E**). Hence, these three markers adopted the localization of  
161 FIT-GFP upon co-expression and suggest that FIT NBs have a speckle function.

162 Scale bar: 2  $\mu$ m. Arrowheads indicate colocalization within NBs. G = GFP; R =  
163 mRFP. Fluorescence protein analysis was conducted in transiently transformed  
164 *N. benthamiana* leaf epidermis cells, following the standardized FIT NB analysis  
165 procedure. Representative images from four to seven independent experiments are  
166 shown. For data with type I markers (no colocalization) and type II markers (partial  
167 colocalization) see **Supplemental Figure S3** and **Figure 5**.

168 **Figure 7**

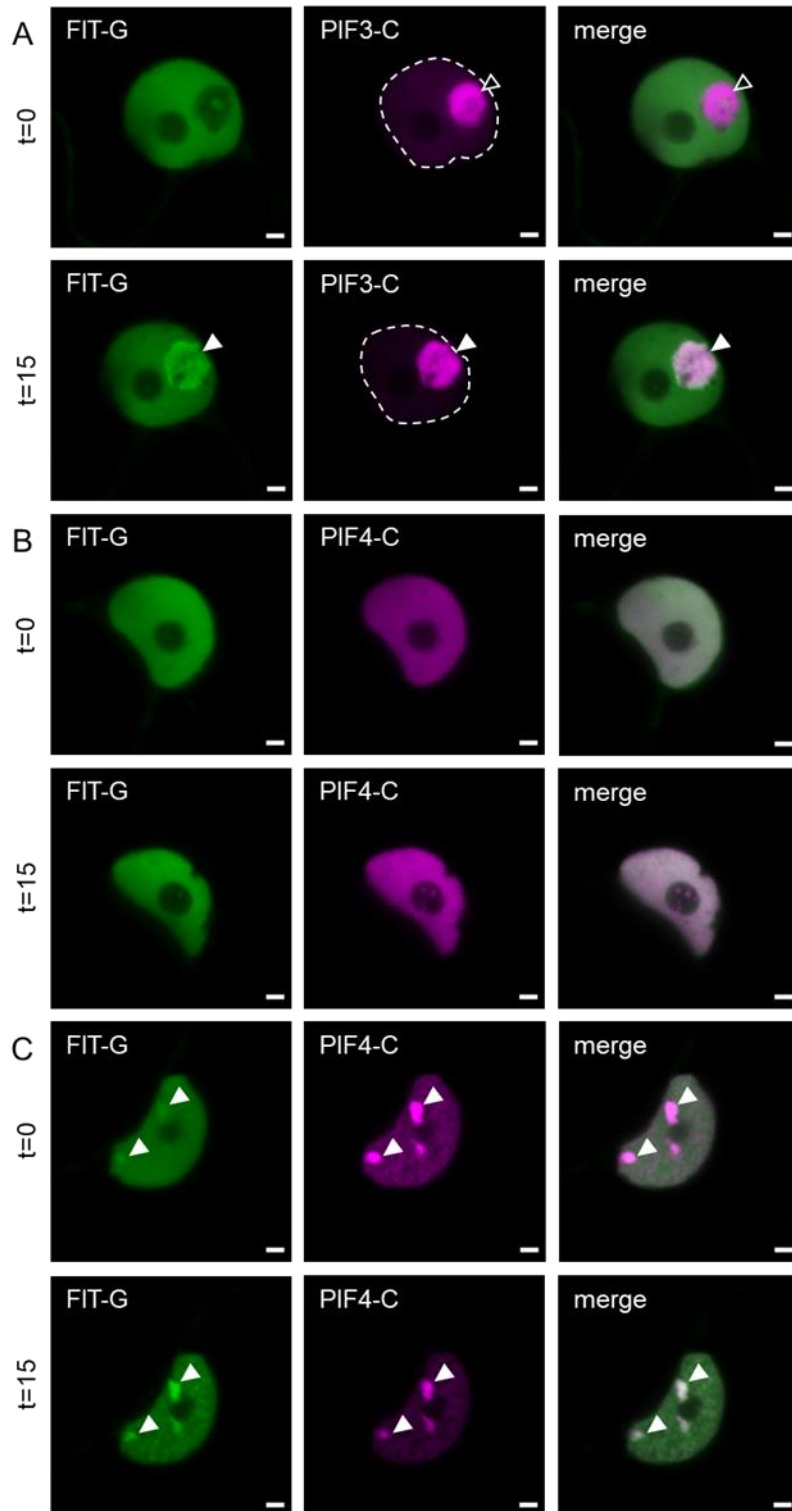

169

170 **Figure 7: FIT colocalized with photobody (PB) markers in distinct PBs.**

171 Confocal images showing localization of FIT-GFP and PB markers upon co-  
172 expression in the nucleus at t=0 and t=15 min. Co-expression of FIT-GFP with A, PIF3-  
173 mCherry, and B and C, PIF4-mCherry, in B, showing a typical pattern with absence of NBs  
174 (ca. 50% of nuclei), in C, showing a typical pattern with presence of NBs (ca. 50% of cells).  
175 When FIT-GFP was co-expressed with PB markers, FIT NBs did not appear at t=5 min,  
176 but instead, FIT-GFP colocalized with PB markers in PBs at t=15 min. A, PIF3-mCherry  
177 localized predominantly to a single large PB at t=0 and t=15 min. FIT-GFP colocalized  
178 with PIF3-mCherry in this single large PB at t=15 min. B, PIF4-mCherry and FIT-GFP were  
179 both homogeneously distributed in the nucleoplasm at t=0 and t=15 min. In C, FIT-GFP  
180 colocalized with PIF4-mCherry in PBs at t=0 and t=15 min. The same localization patterns  
181 were found for PIF3-mCherry and PIF4-mCherry upon single expression (compare with  
182 **Supplemental Figure S5**). Hence, FIT-GFP was recruited to the two distinct types of PIF3  
183 and PIF4 PBs, whereas PIF3 and PIF4 were not recruited to FIT NBs. This suggests that  
184 FIT NBs are affected by the presence of PIF3- and PIF4-containing PBs and a connection  
185 to light signalling exists.

186 Scale bar: 2  $\mu$ m. Arrowheads indicate colocalization in PBs. G = GFP; C = mCherry.  
187 Fluorescence protein analysis was conducted in transiently transformed *N. benthamiana*  
188 leaf epidermis cells, following the standardized FIT NB analysis procedure.  
189 Representative images from four to six independent experiments are shown.

190 **Figure 8**

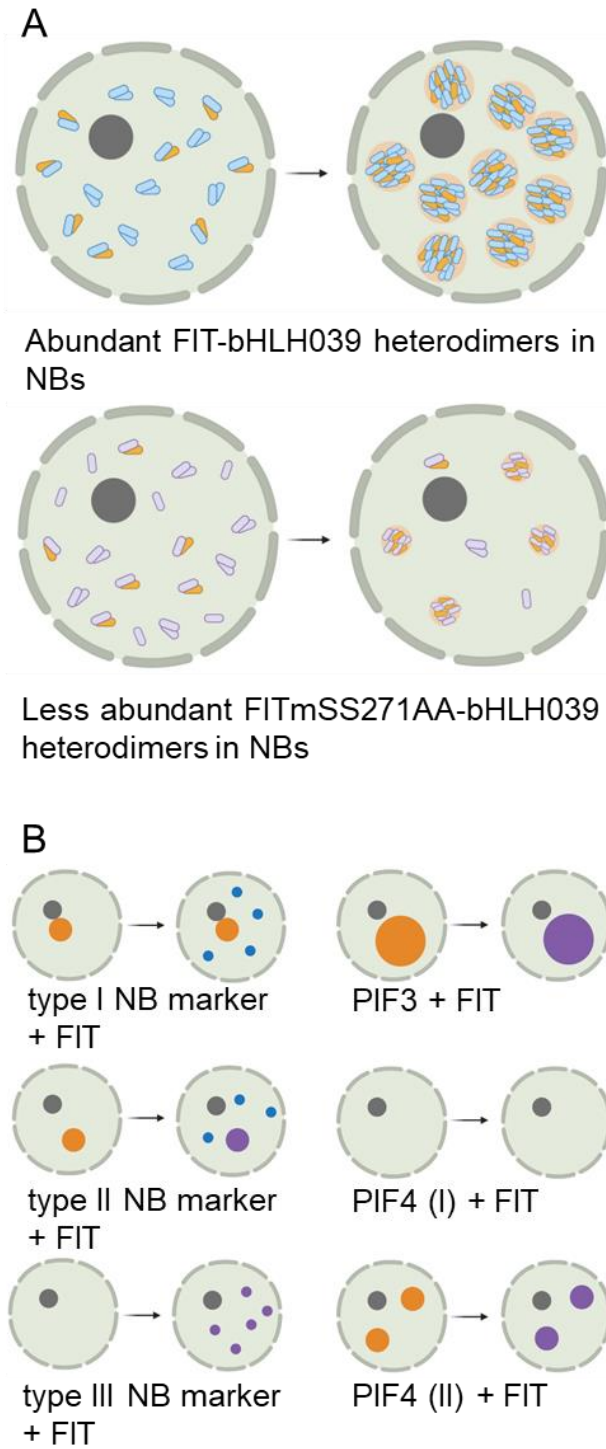

191

192 **Figure 8: Schematic summary models illustrating the dynamics of FIT NB**  
193 **formation, suggesting that FIT NBs are related to transcriptional and**  
194 **posttranscriptional regulation in speckles.**

195 A, Light-induced FIT NB formation in the presence of FIT (top) or FITmSS271AA  
196 (bottom) and bHLH039. FIT accumulates in FIT NBs, that are of circular shape and may  
197 undergo LLPS. FIT homodimers and FIT-bHLH039 heterodimers are present in the  
198 nucleus at t=0 and t=5 min. At t=5 min, homo- and heterodimers are preferentially present  
199 in FIT NBs versus NP. IDR<sup>Ser271/272</sup> may be important for multivalency of FIT, as it is  
200 disrupted in FITmSS271AA. This mutant has low protein interaction ability (see also Gratz  
201 et al., 2019). Consequently, FITmSS271AA accumulates slowly in NBs (taking up to  
202 t=15 min). FIT-bHLH039 is an active TF complex for upregulating the expression of iron  
203 acquisition genes in roots in contrast to FITmSS271AA-bHLH039 (Gratz et al., 2019).  
204 Hence, FIT NBs are subnuclear sites related to transcriptional regulation and because of  
205 their colocalization with speckle components, also to speckles. B, Dynamics of NBs  
206 revealed by co-expression. FIT did not colocalize with type I NB markers (Cajal body  
207 markers; coilin, U2B''). FIT colocalized with type III markers (speckle components;  
208 UAP56H2, P15H1, PININ) and these markers adopted the FIT pattern at t=5 min following  
209 the light trigger. Type II NB markers (speckle components; SR45, SRm102) and PB  
210 markers (PIF3, PIF4) localized to their own distinct NBs into which FIT became recruited  
211 in light-inducible manner. In case of type II NB markers, these markers did not localize in  
212 FIT NBs. Hence, there is a light-inducible effect acting upon FIT to become recruited by  
213 type II NBs and PBs or to recruit proteins into its own NBs. In summary, FIT NBs are light-  
214 inducible subnuclear sites linking transcriptional and posttranscriptional regulation in  
215 speckles.

216 A, Blue ovals = wild-type FIT; violet ovals = mutant FITmSS271AA; orange ovals =  
217 bHLH039. B, grey circles = nucleoli; orange circles = NB/PB marker NBs/PBs; blue circles  
218 = FIT NBs; lilac circles = colocalization of NB/PB marker NBs/PBs and FIT NBs.
